# Supplementary material for: Molecular Networks of Postia placenta Involved in Degradation of Lignocellulosic Biomass Revealed from Metadata Analysis of Open Access Gene Expression Data
Source: PubMed Central journal article supplement — Int J Biol Sci. 2018 Feb 9;14(3):237–52. doi: 10.7150/ijbs.22868 (PMC5859471; doi:10.7150/ijbs.22868), 2018-02-09
Supplement: ijbsv14p0237s1.pdf [file ijbsv14p0237s1.pdf]

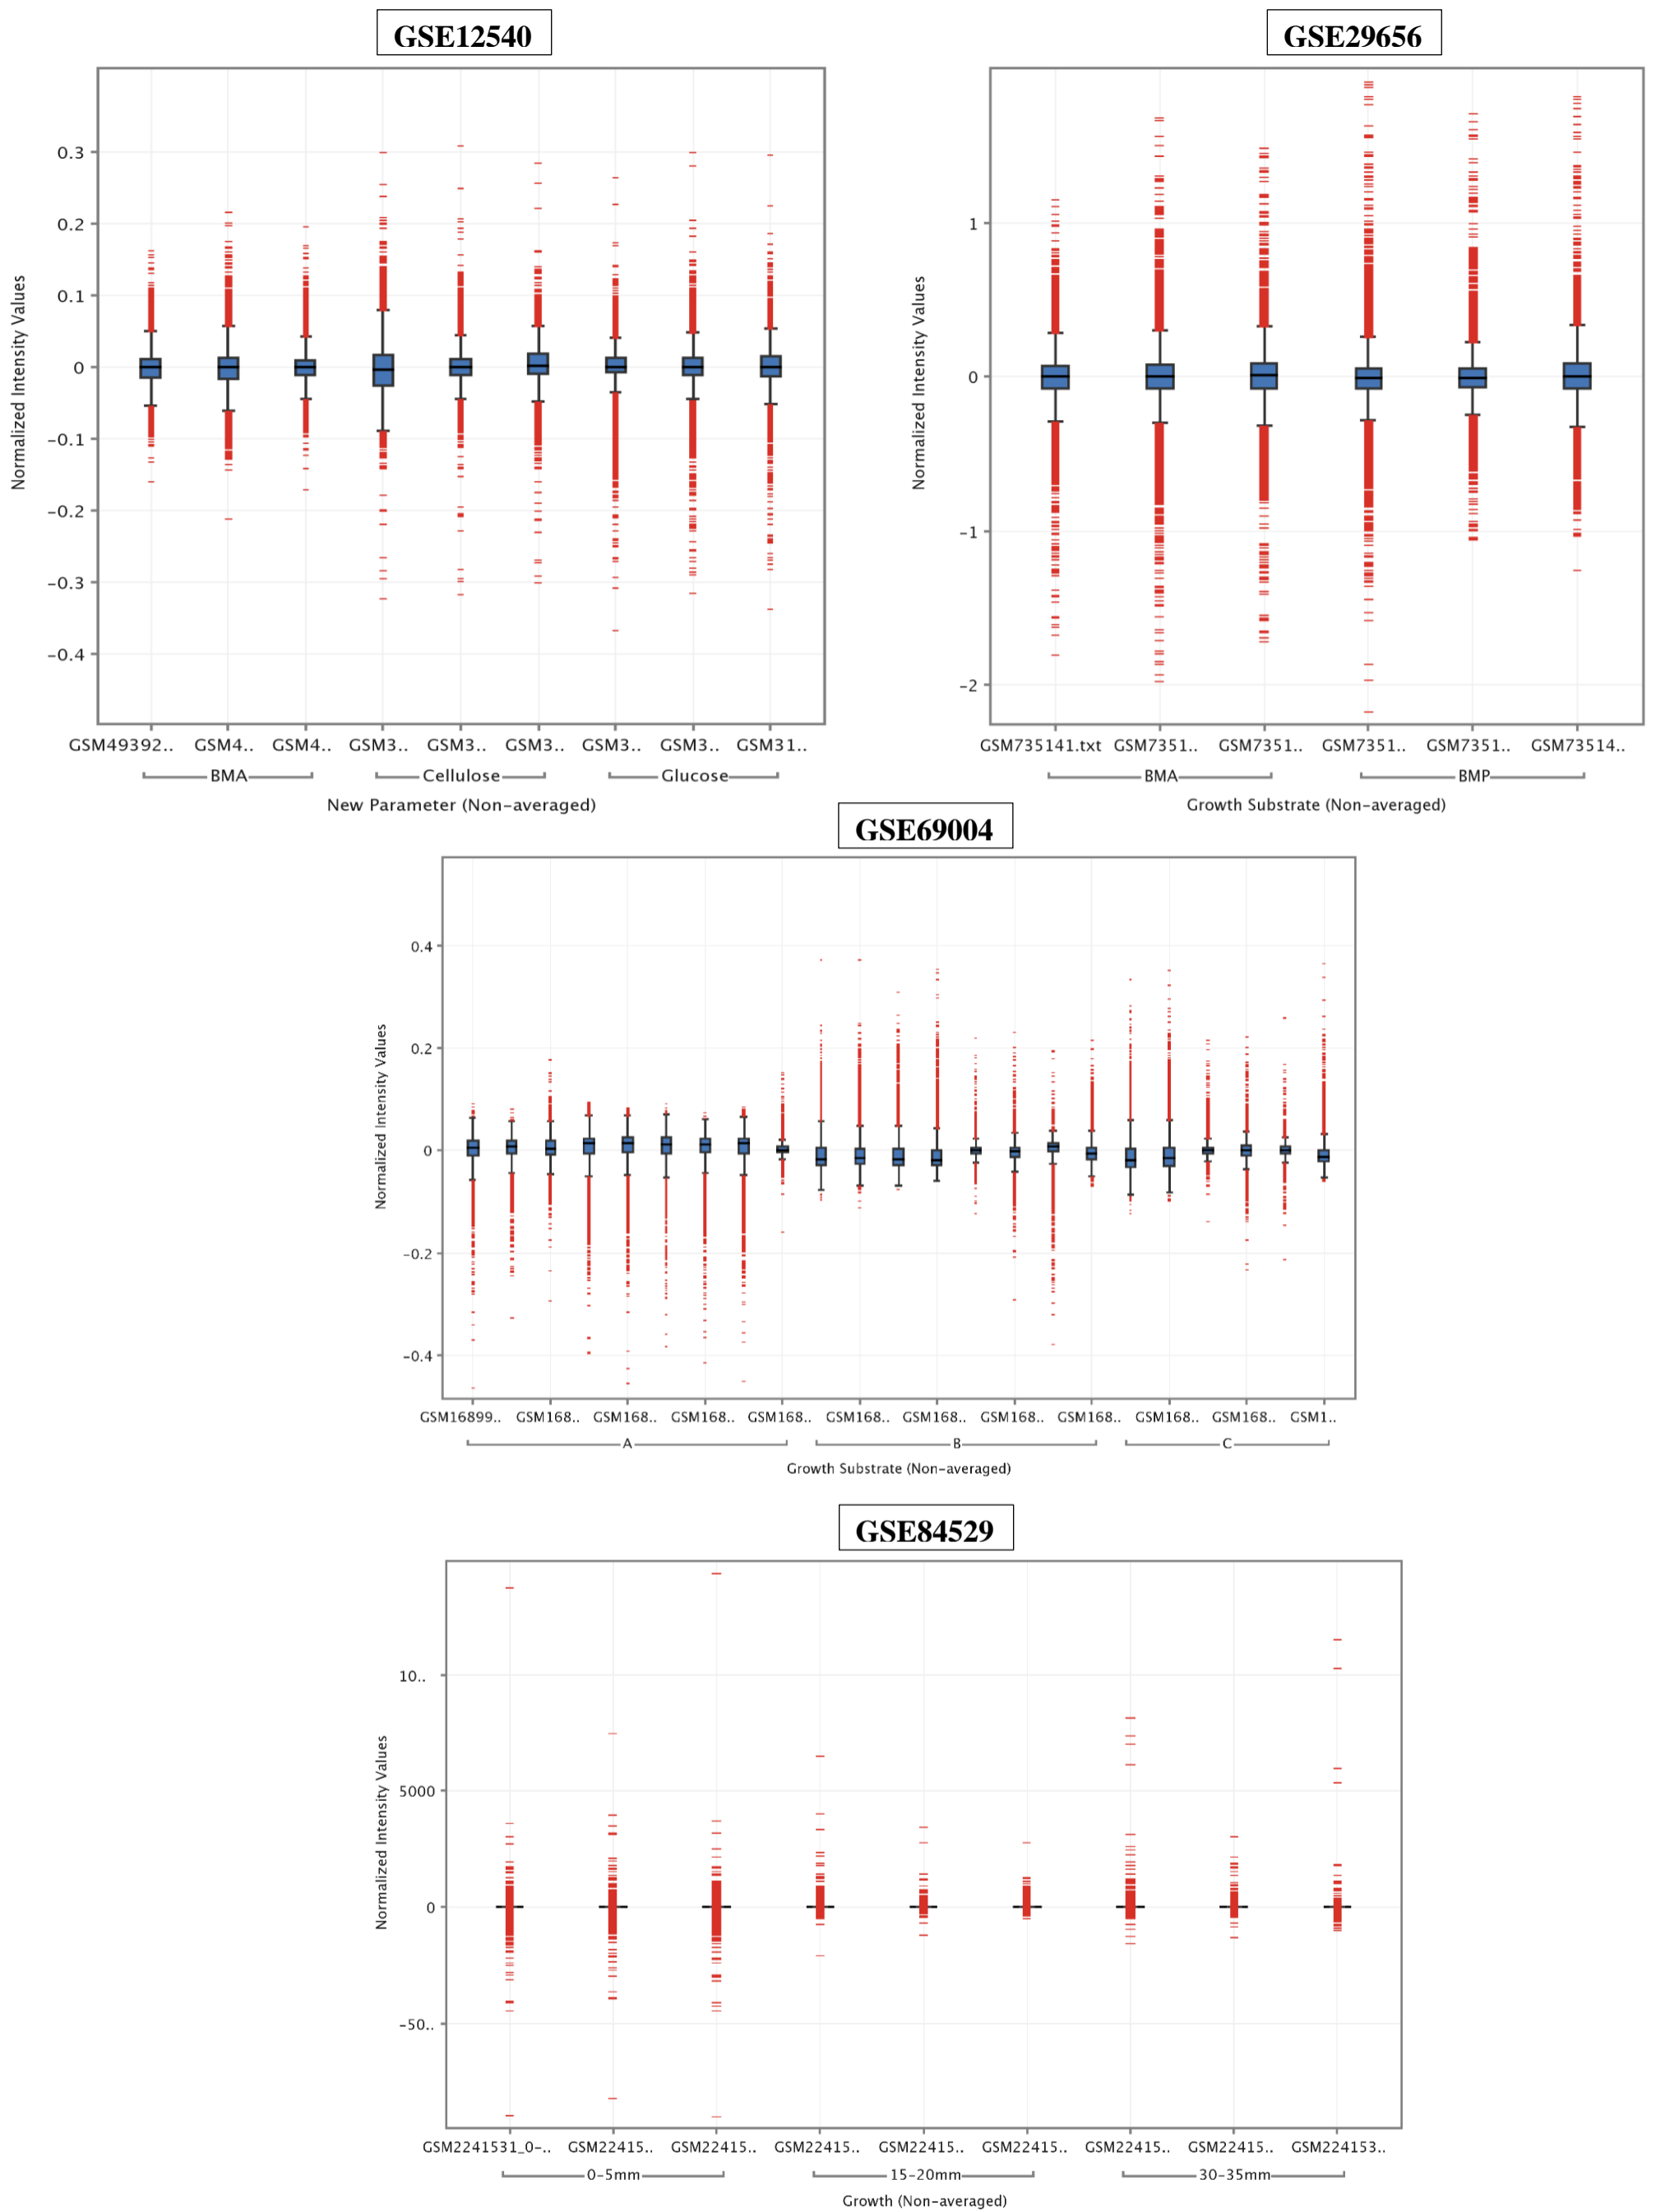

**Figure S2:- Individual gene expression profiles of various differentially expressed genes among the datasets A) GSE12540 B) GSE29656 and C) GSE69004 datasets.**

**Commonly expressed genes encoding for CAZymes in GSE12540 dataset:**

**Glycoside hydrolase-28**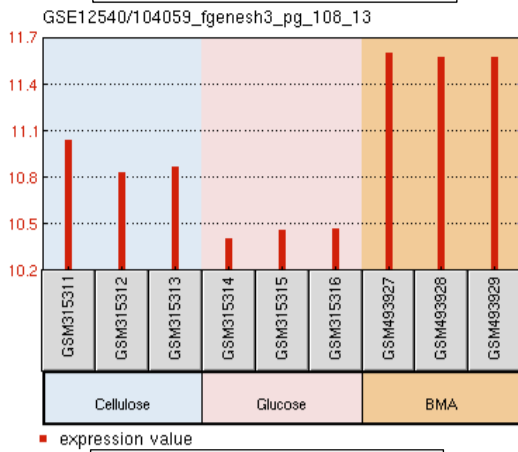**Glycoside hydrolase-51**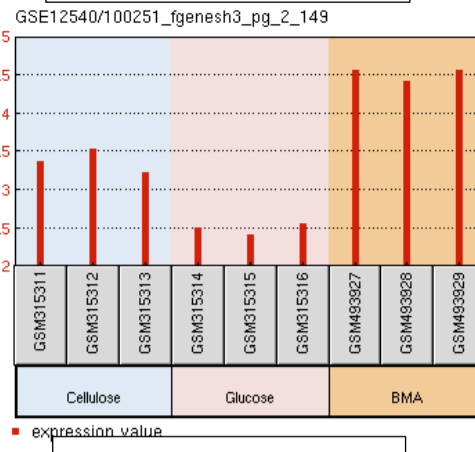**Glycoside hydrolase-128**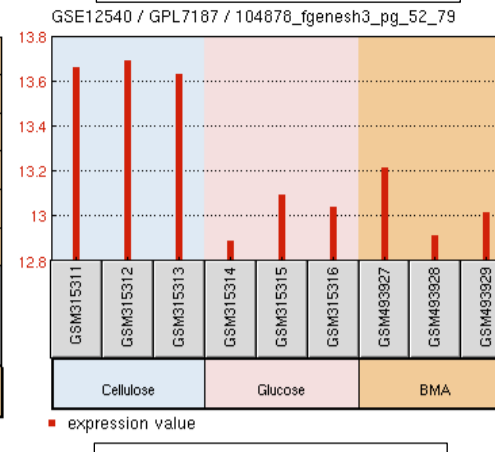**GMC-Oxidoreductase AA3-2**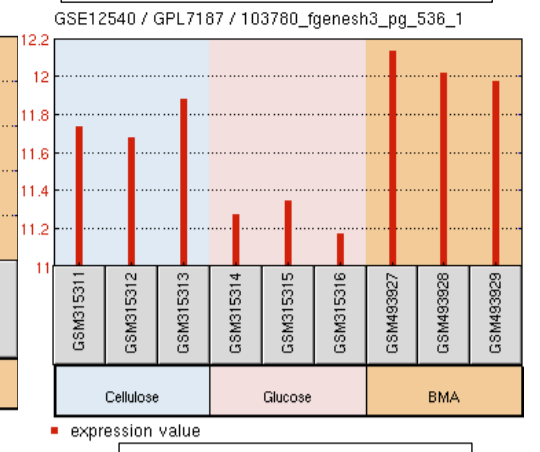**Glycoside hydrolase-55**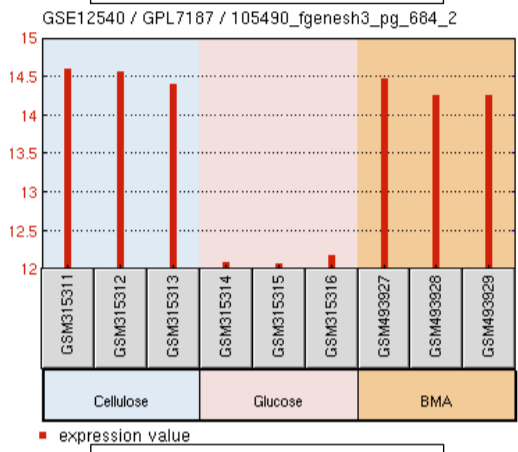**Glycoside hydrolase-10**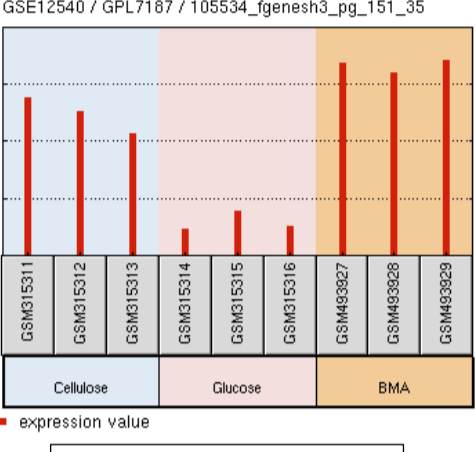**Glycoside hydrolase-28**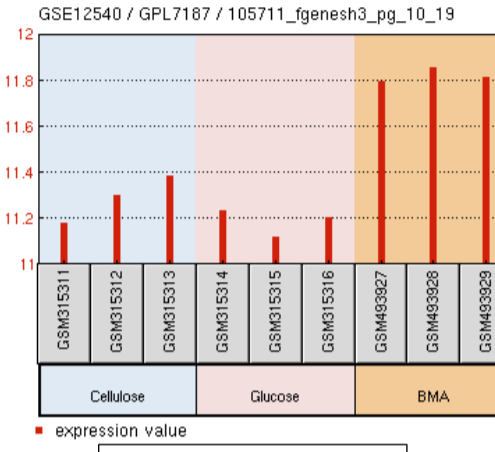**Glycoside hydrolase-95**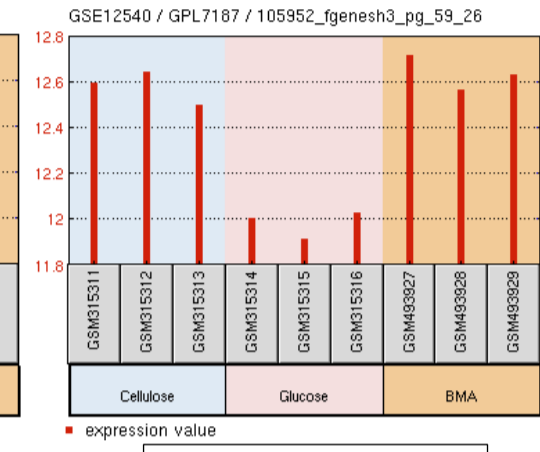**Glycoside hydrolase-18**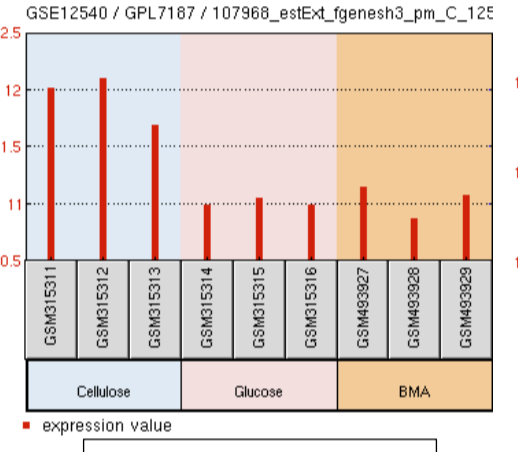**Glycoside hydrolase-1**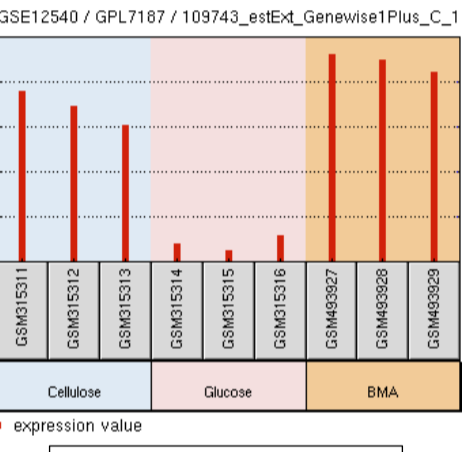**Ferroxidase-AA1-2**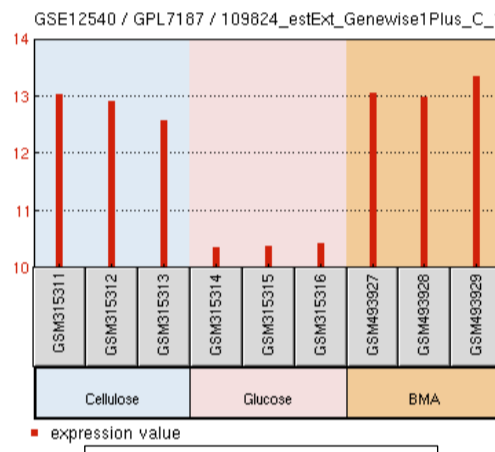**Glycoside hydrolase-3**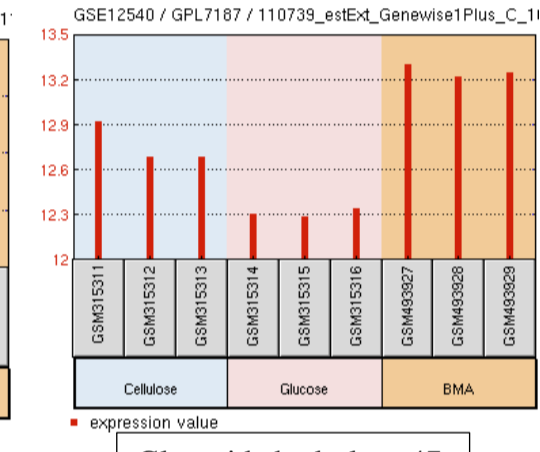**Glycoside hydrolase-71**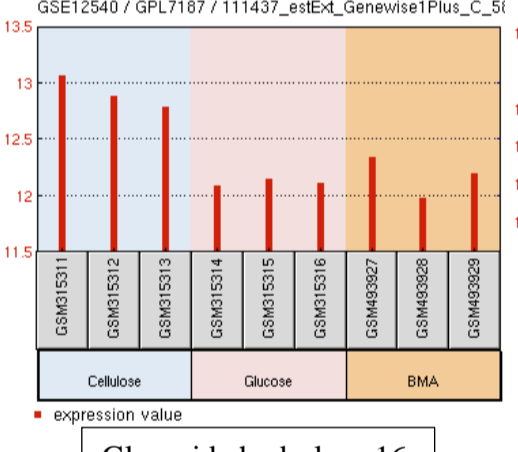**Glycoside hydrolase-88**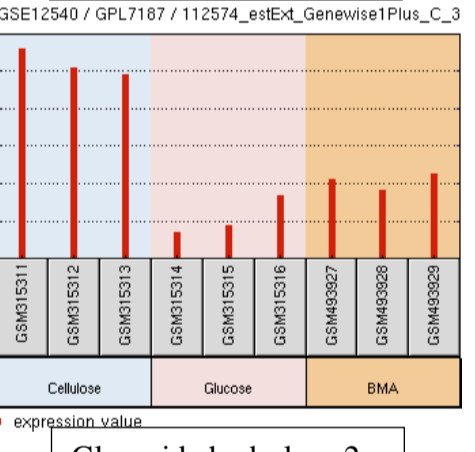**Glycoside hydrolase-16**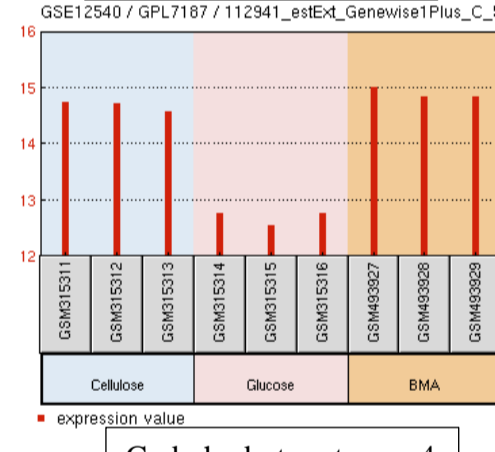**Glycoside hydrolase-47**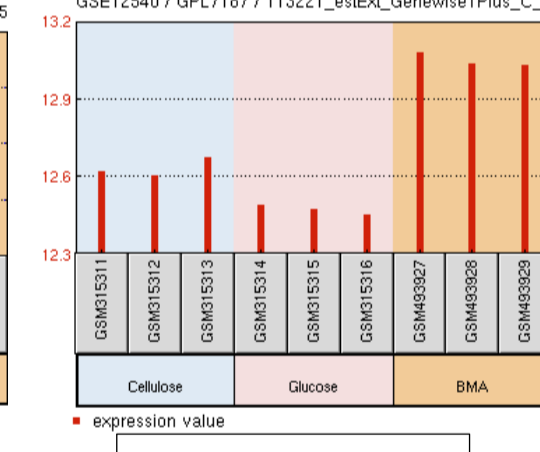**Glycoside hydrolase-16**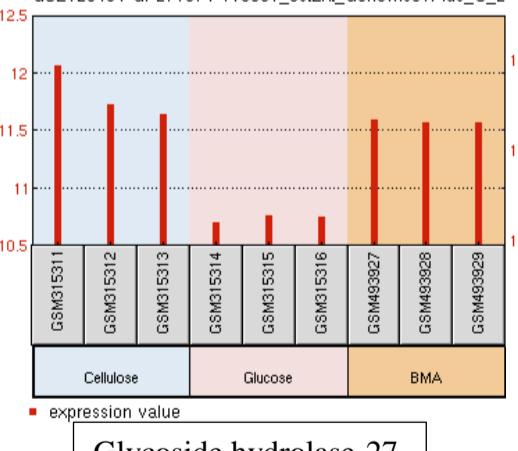**Glycoside hydrolase-2**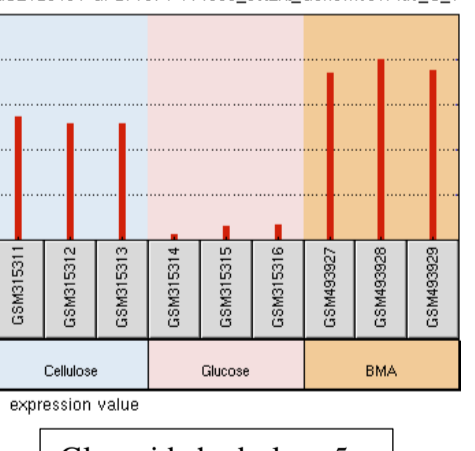**Carbohydrate esterase-4**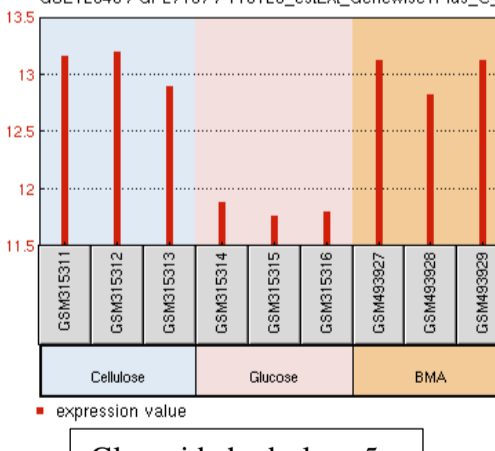**Glycoside hydrolase-31**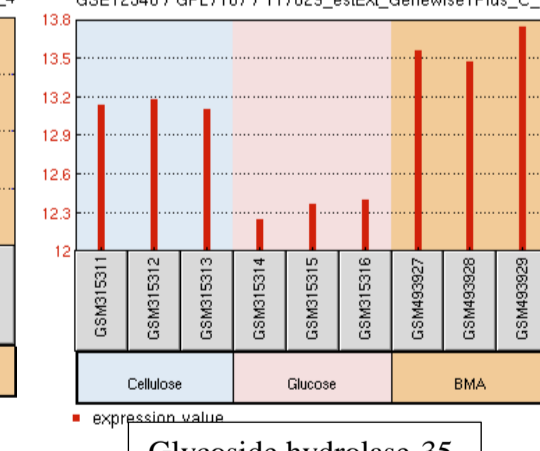

### Glycoside hydrolase-2

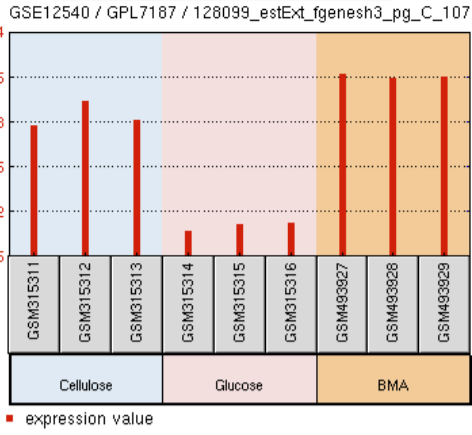

### Glycoside hydrolase-3

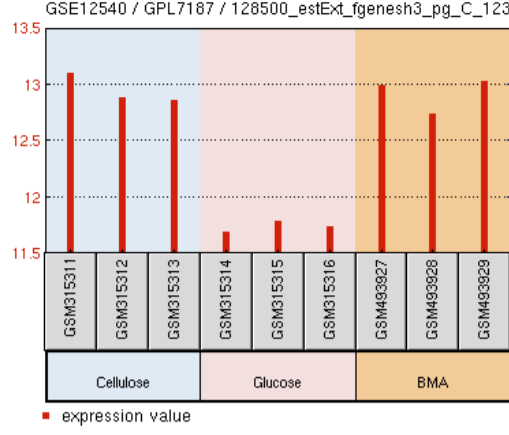

### GMC Oxidoreductase

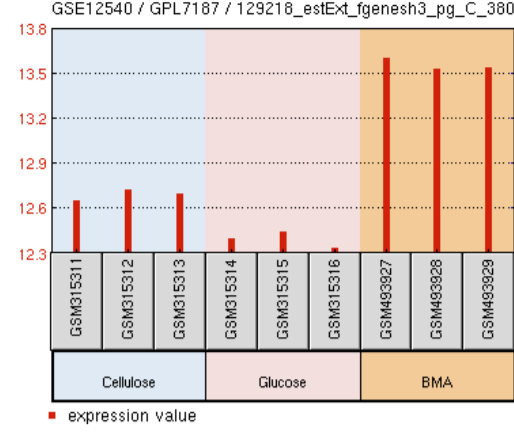

### Glycoside hydrolase-2

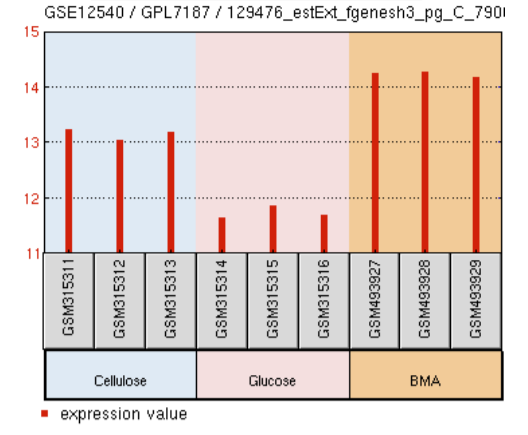

### Glycoside hydrolase-3

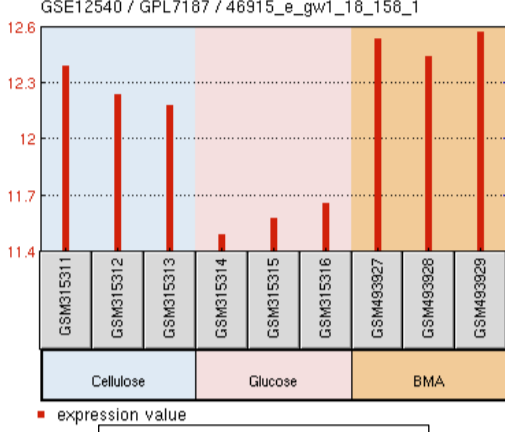

### Glycoside hydrolase-12

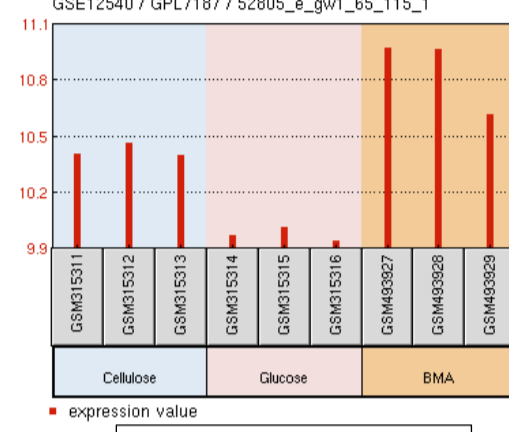

### Carbohydrate esterase-8

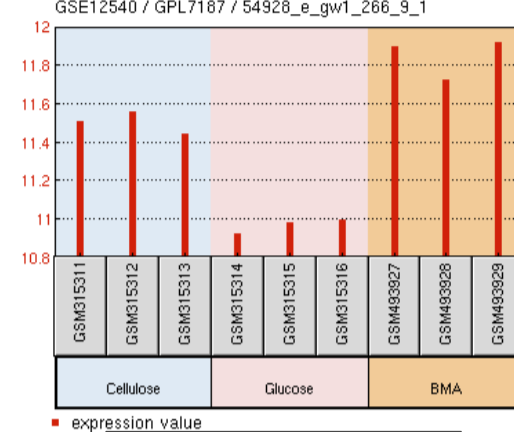

### Glycoside hydrolase-31

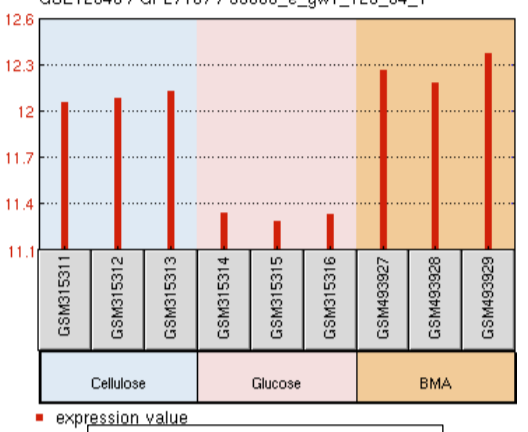

### Glycoside hydrolase-2

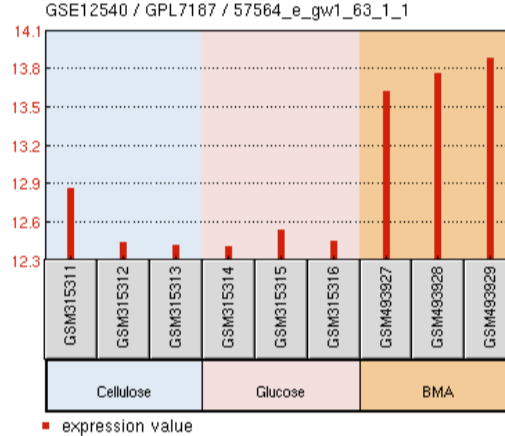

### Glycoside hydrolase-28

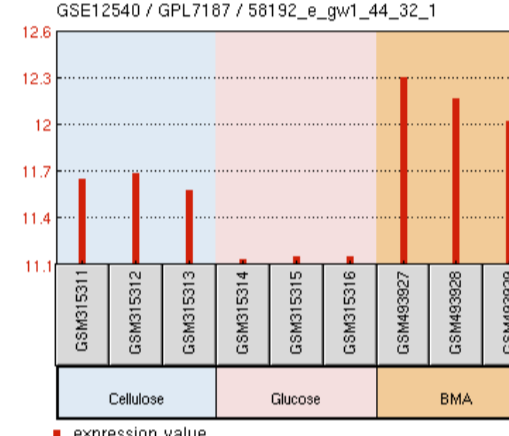

### Glycoside hydrolase-37

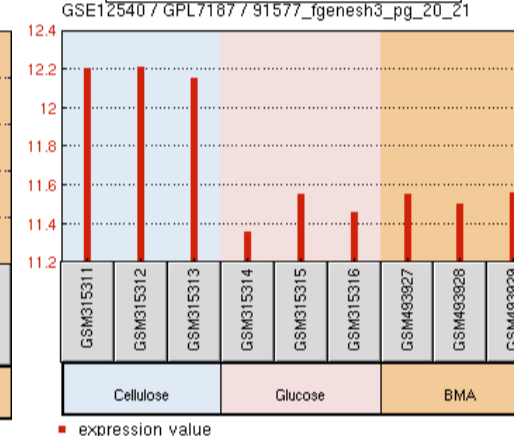

### GMC-Oxidoreductases

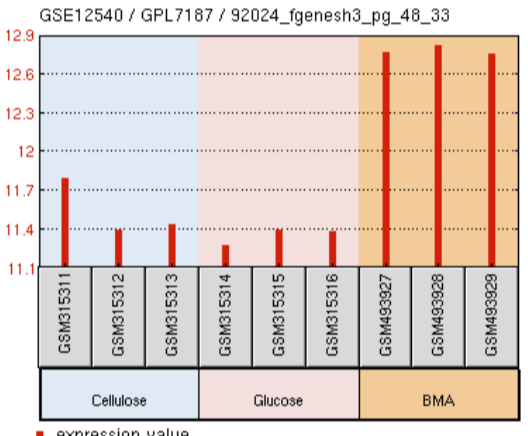

### Glycoside hydrolase-51

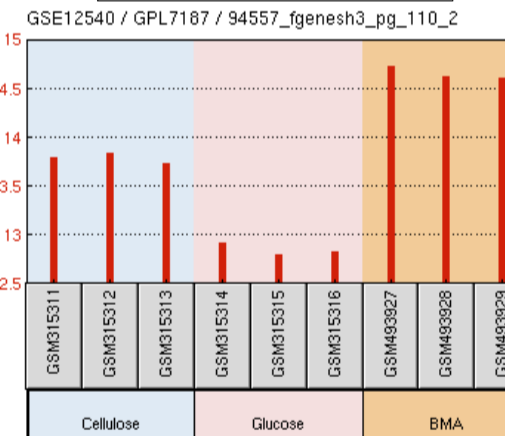

### Glycoside hydrolase-16

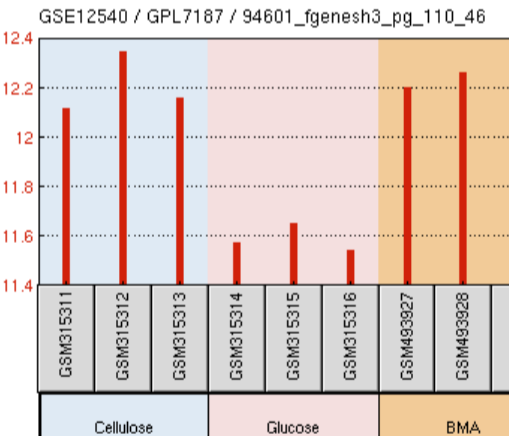

### EXPN Distantly related to Plant

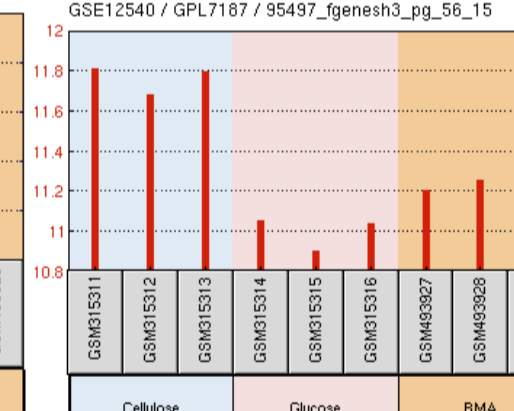

### Glycosyl Transferase-8

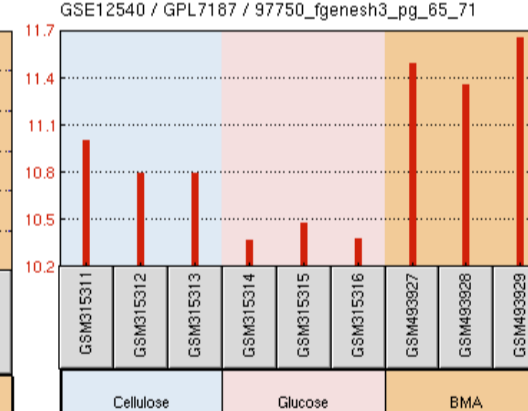

### 2OG-Fe(II) oxygenase superfamily

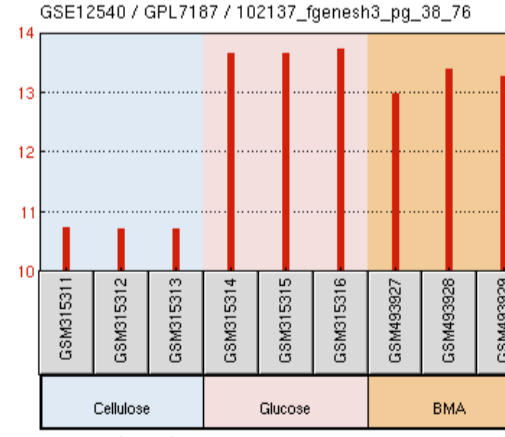

### 3-beta hydroxysteroid dehydrogenase

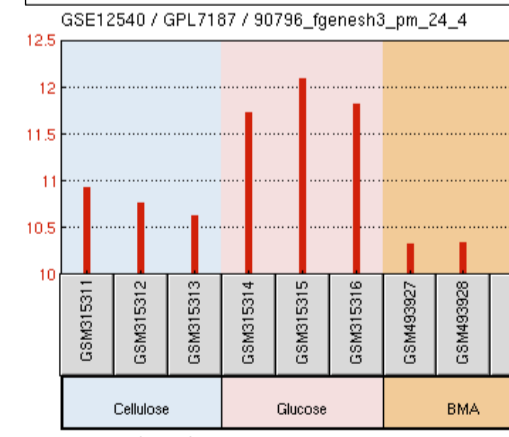

### AAA ATPase

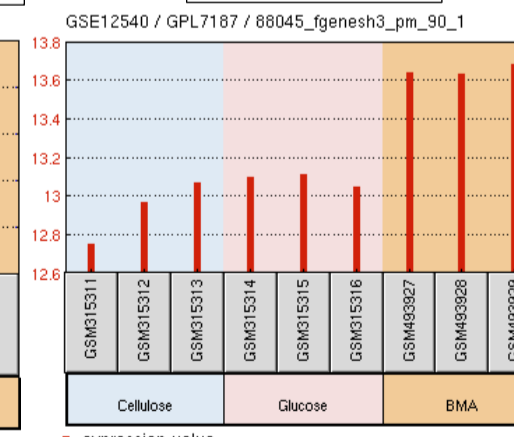

### ABC Transporters

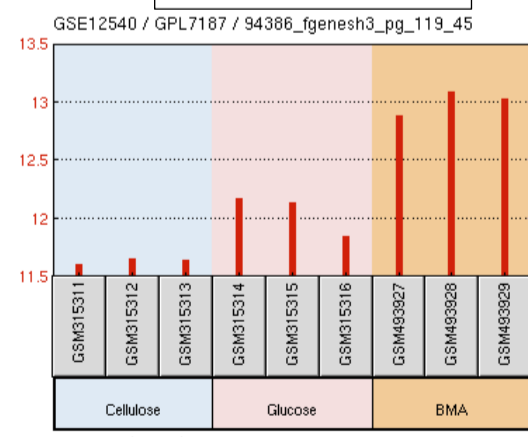

### Aldehyde dehydrogenase

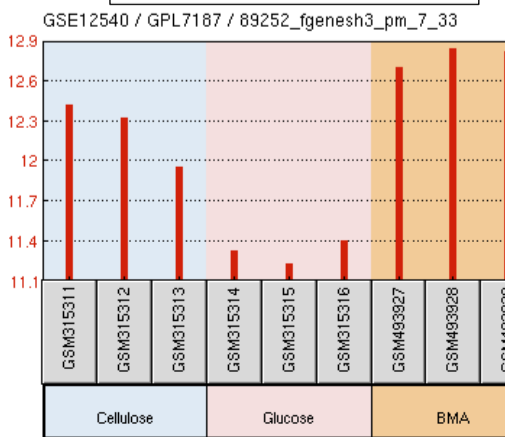

### Amidase

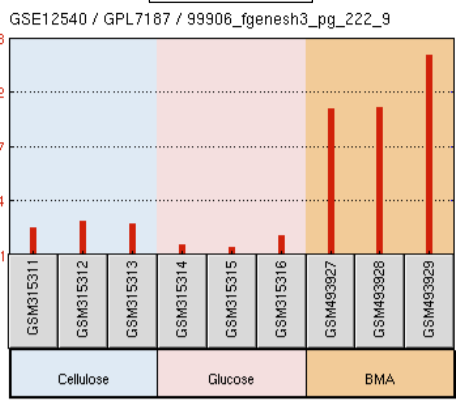

### Amidohydrolase

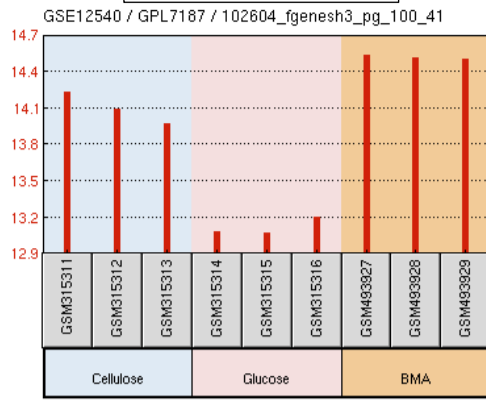

### Argonaut and Dicer Complex

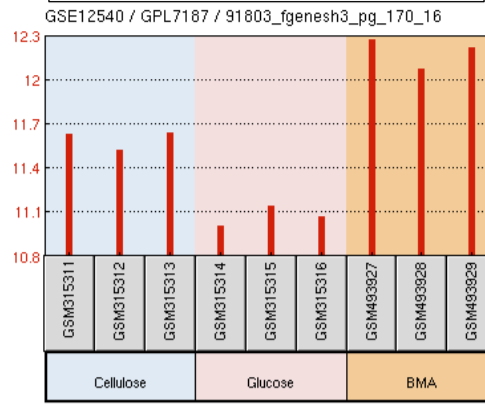

### Aromatic ring hydroxylase

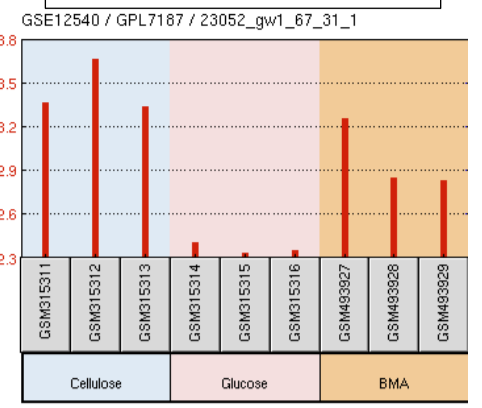

### ATP/GTP binding motif

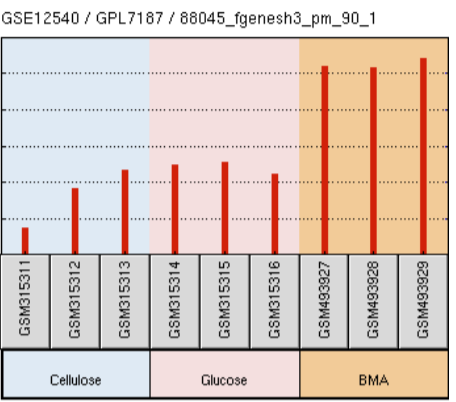

### ATP binding region, ATPase

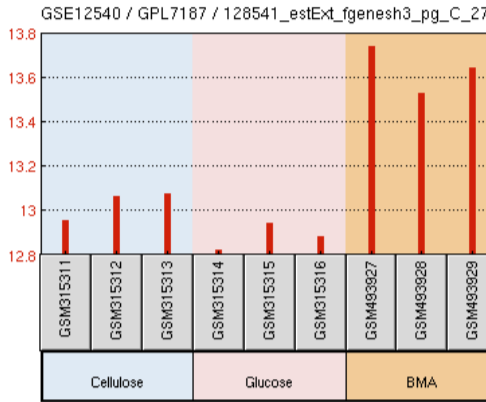

### Basic helix loop helix (BHLH)

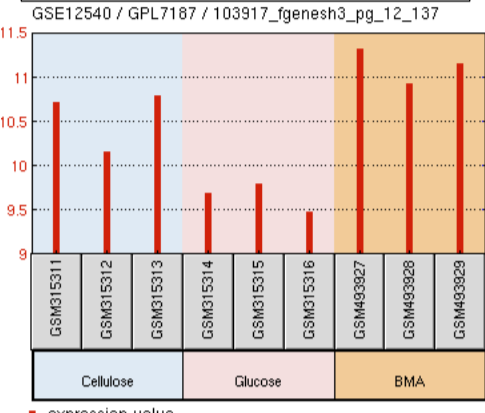

### Beta-lactamase

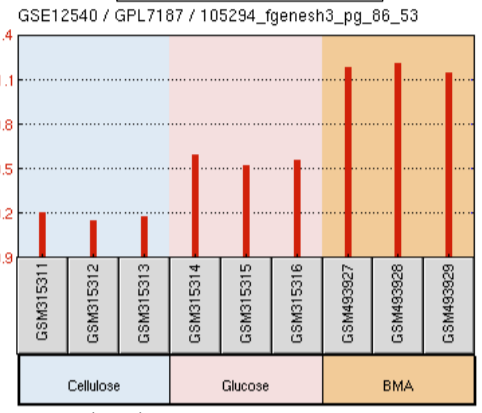

### Calcium/proton exchange

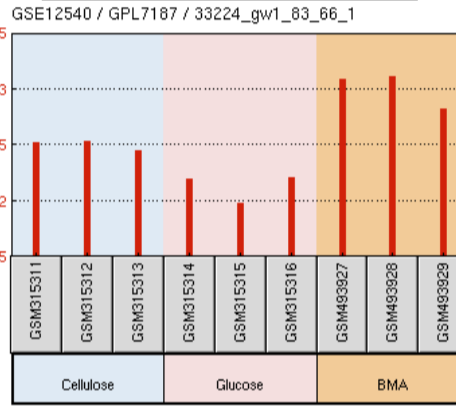

### Carbohydrate kinase FGGY

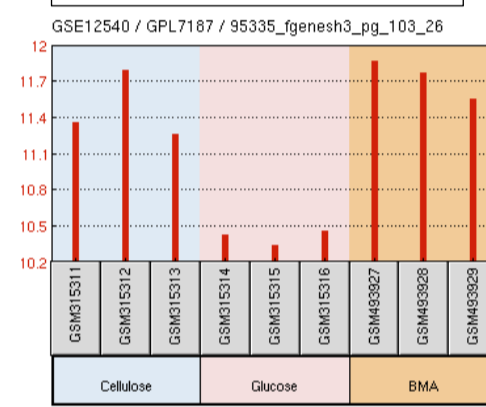

### Carbohydrate kinase PfkB

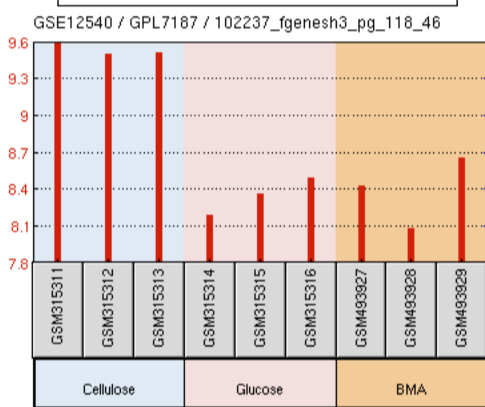

### Carbohydrate binding module V/XII

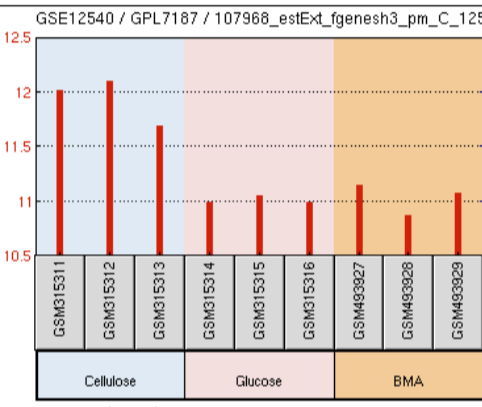

### Carbohydrate esterase type B

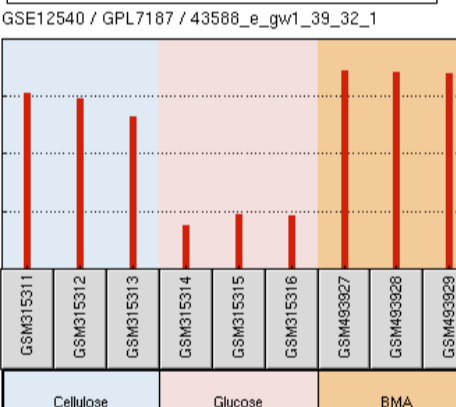

### Carbohydrate esterase type B

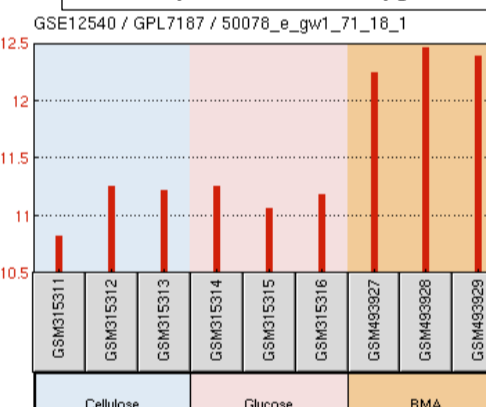

### Caspase 1-p20

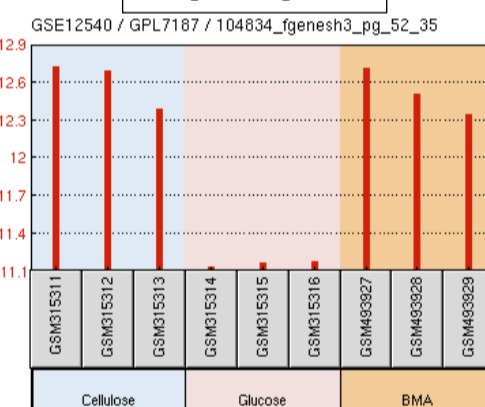

### Catechol dioxygenase

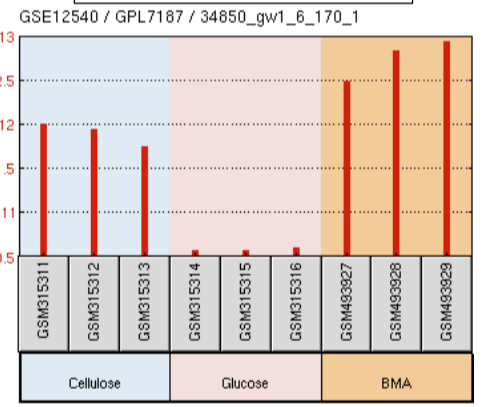

### Chitinase II

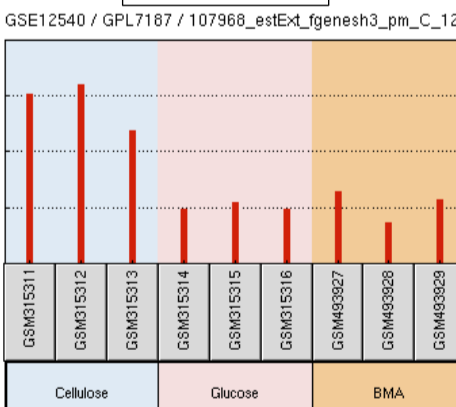

### Chloroperoxidase

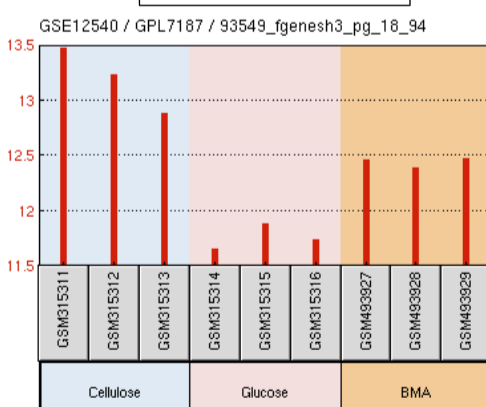

### Citrate Synthase

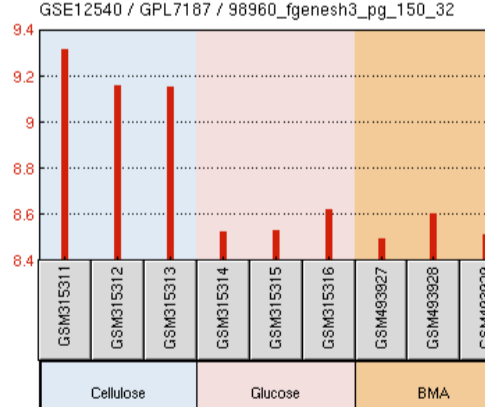

### Cytochrome b/b6

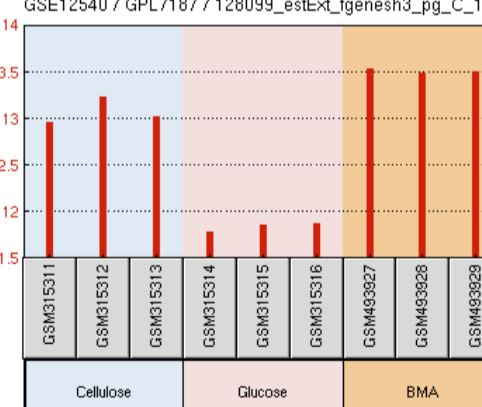

### Cytochrome P450

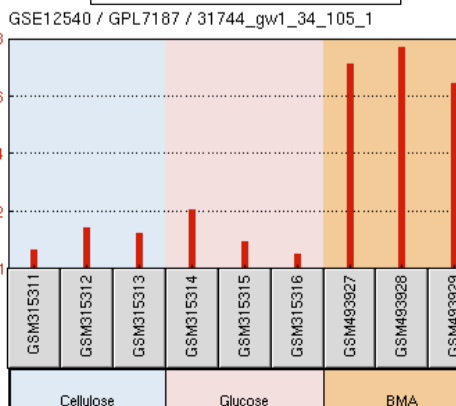

### Cytochrome P450

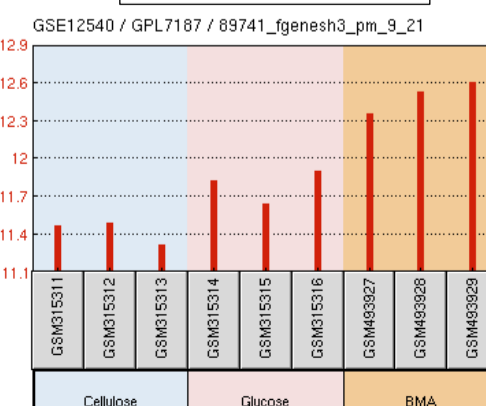

### E-class, P-450 group-I

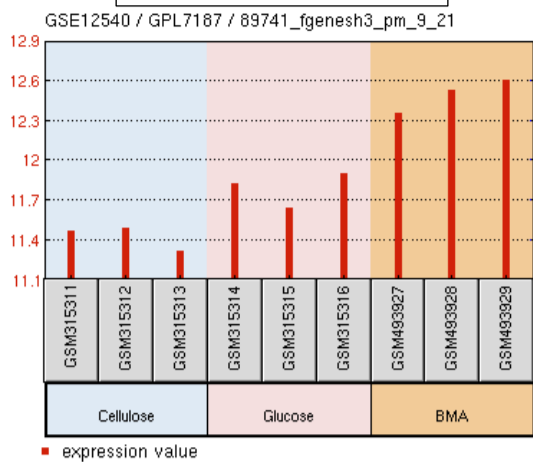

### Esterase/Lipase/Thioesterase

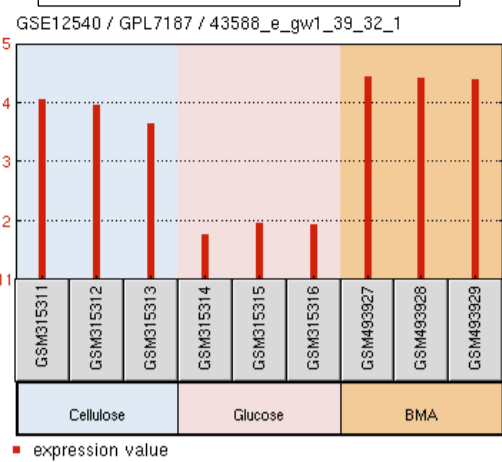

### Flavin monooxygenase (FMO)

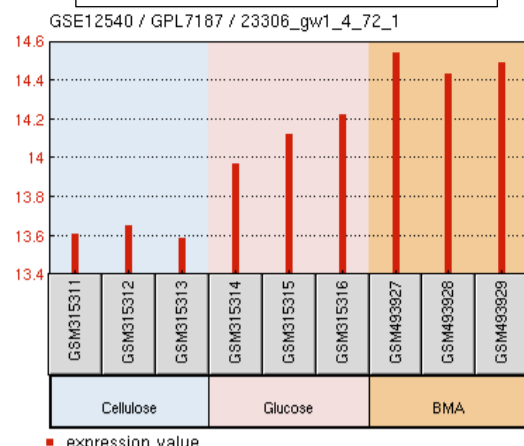

### Fungal specific transcription factor

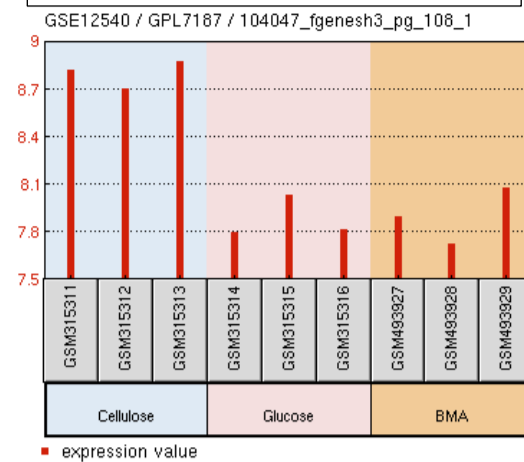

### Glucose /ribitol dehydrogenase

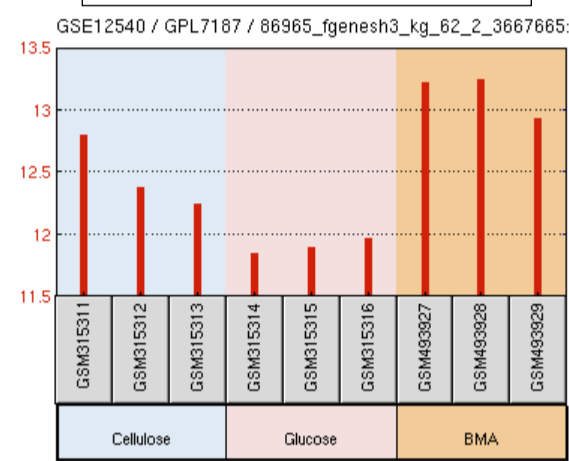

### Glucose /ribitol dehydrogenase

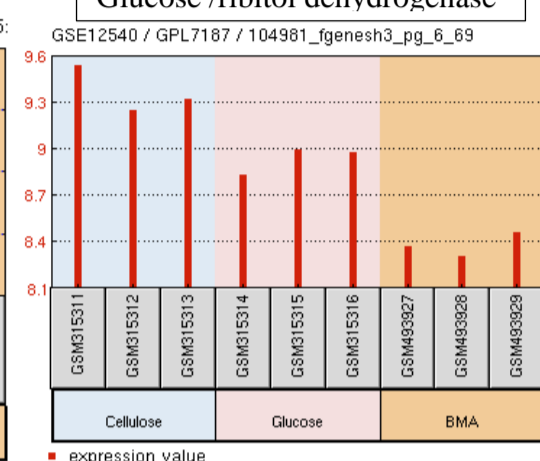

### Glutathione-S-Transferase

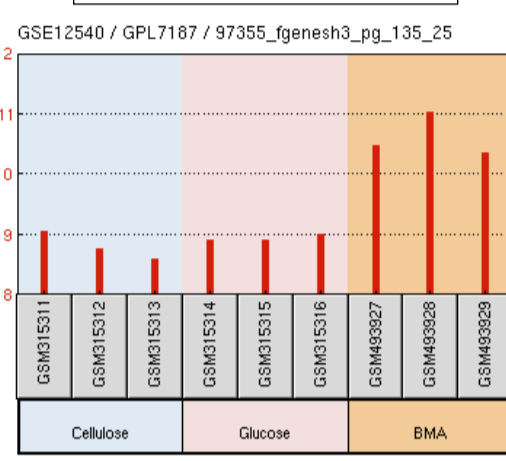

### G-Protein beta WD-40

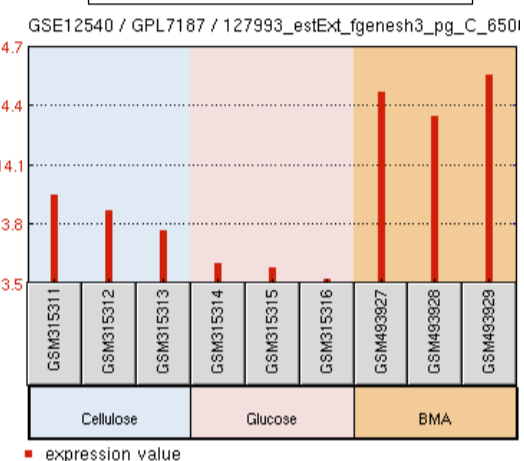

### Intradiol ring cleavage dioxygenase

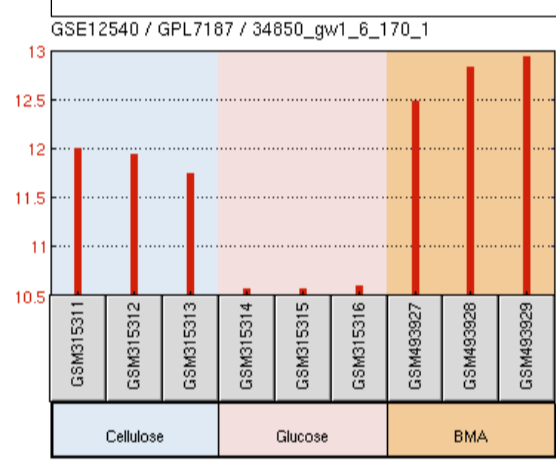

### Iron Permease FTR1

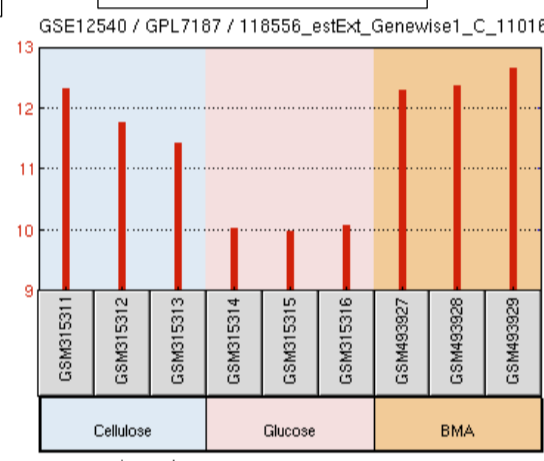

### Major Facilitator Protein

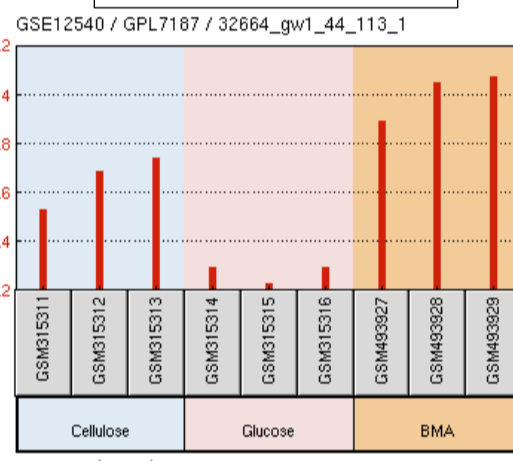

### Monoxygenase, FAD binding

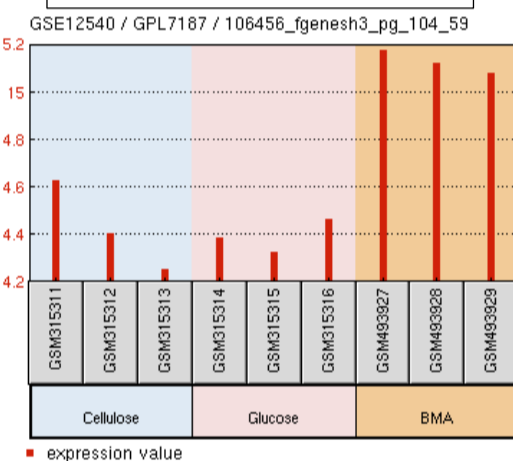

### Multicopper oxidase

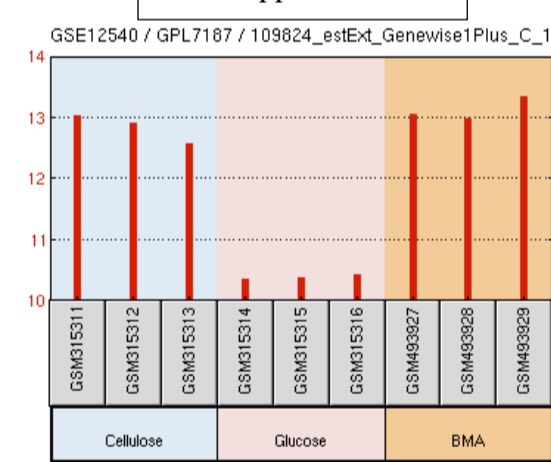

### Oligopeptide Transporter

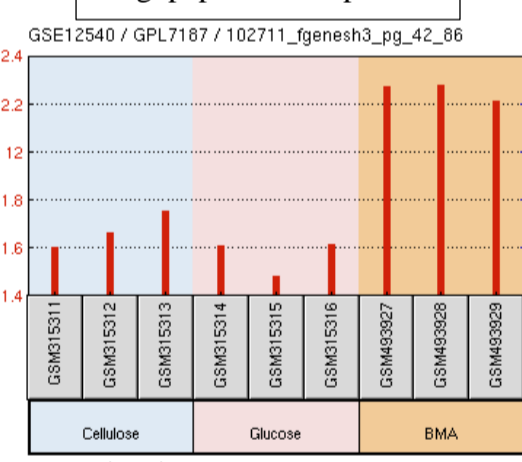

### Pectinesterase

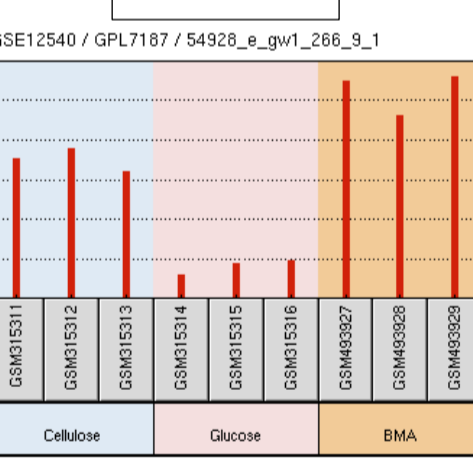

### Polysaccharide deacetylase

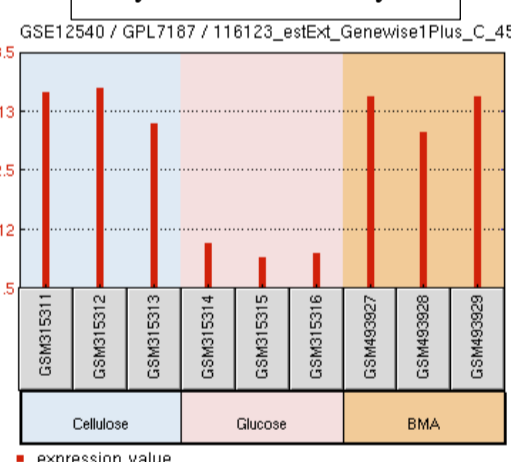

### Pyruvate decarboxylase

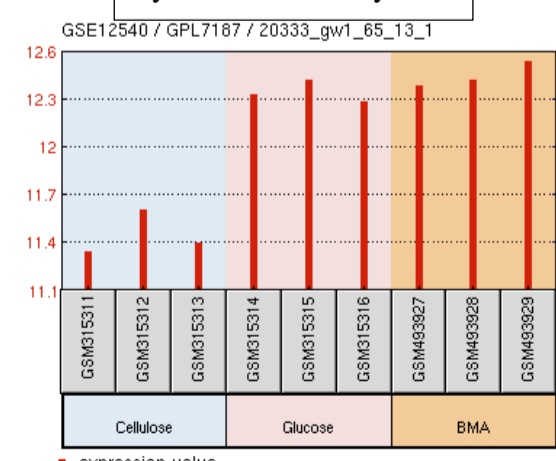

### Short chain dehydrogenase

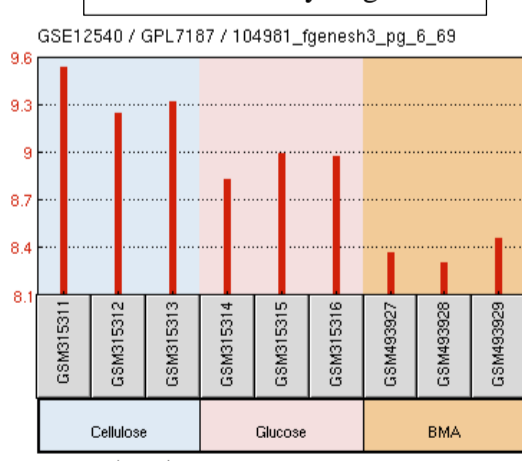

### Sugar Transporter superfamily

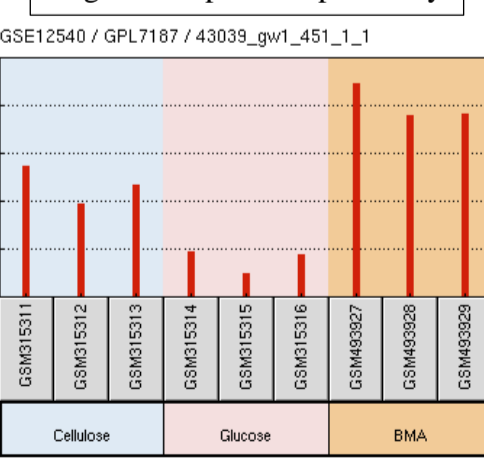

### Tannase and Feruloyl esterase

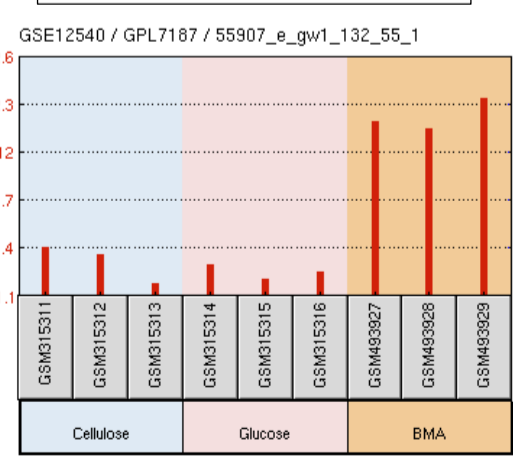

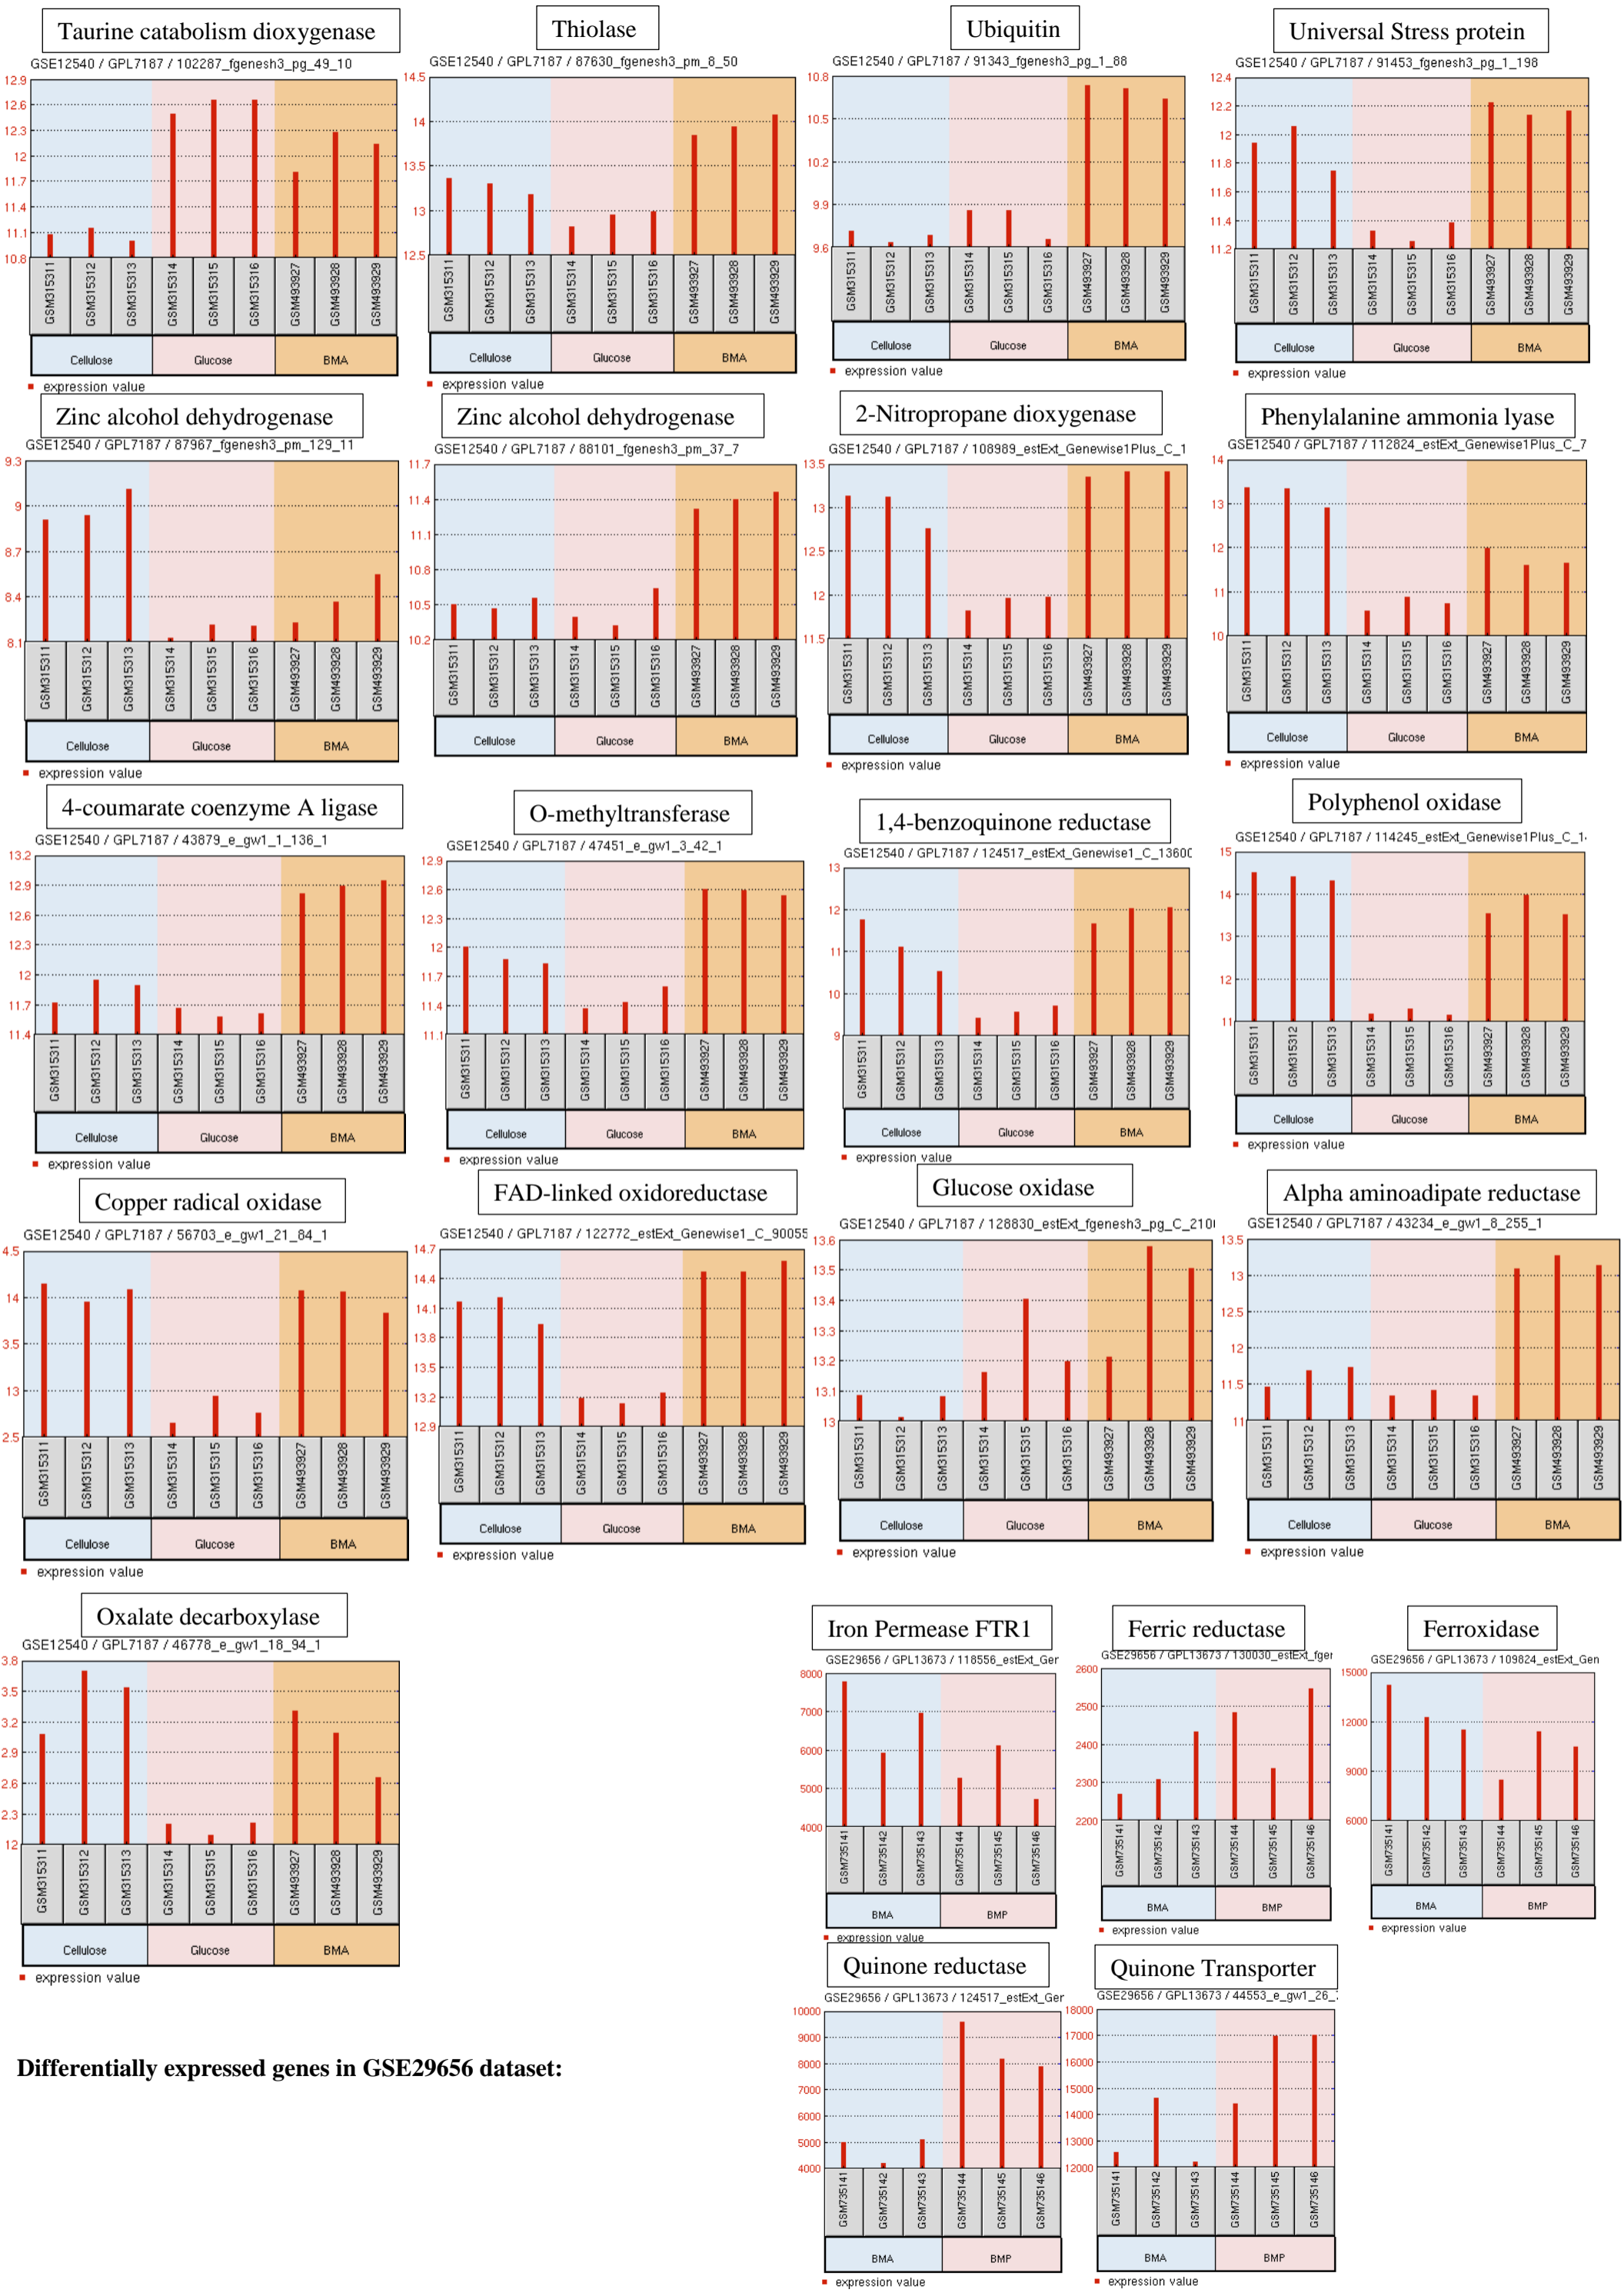

### Glycosyl Transferase-1

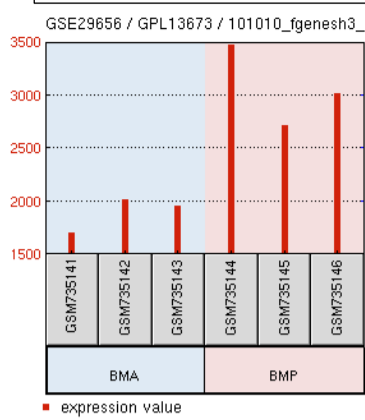

### Glycoside hydrolase-55

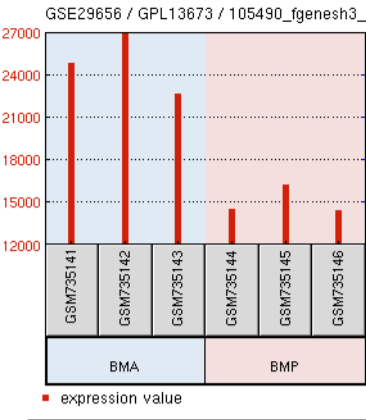

### Glycoside hydrolase-18

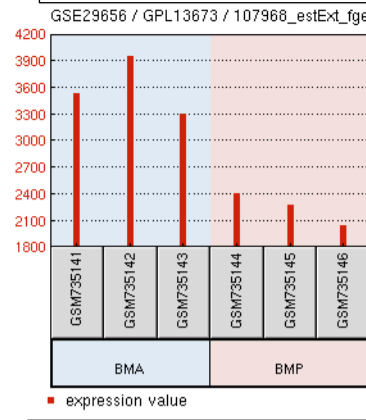

### Laccase

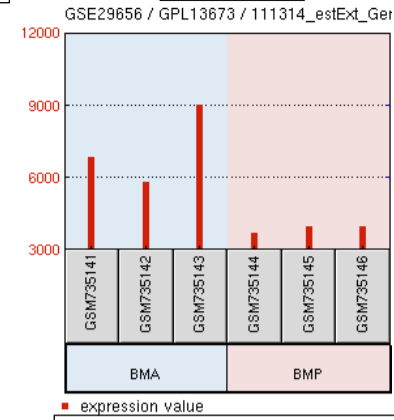

### Glycoside hydrolase-16

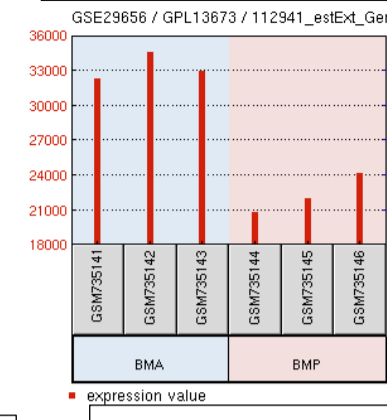

### Glycoside hydrolase-18

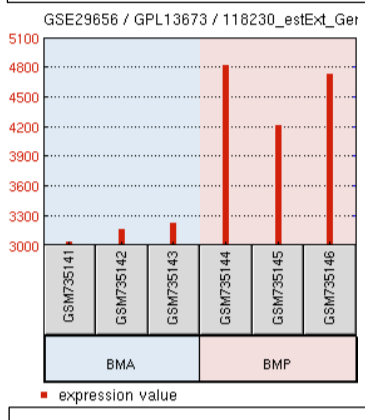

### Glycoside hydrolase-28

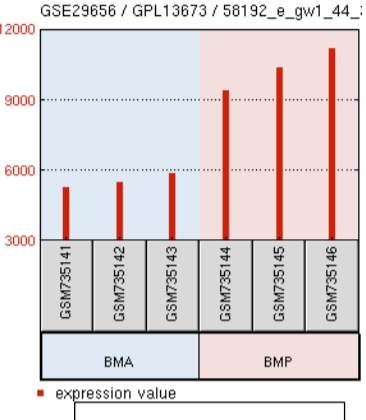

### Glycoside hydrolase-71

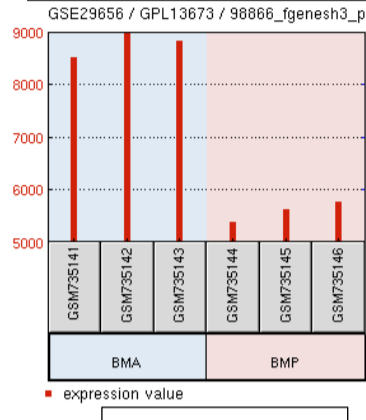

### Carboxylesterase-typeB

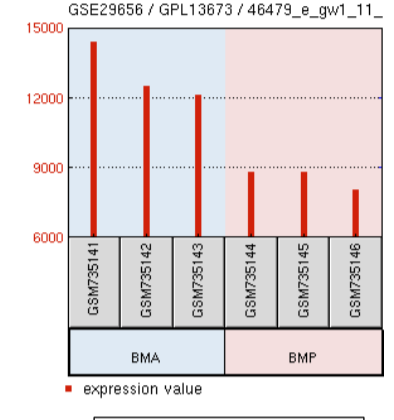

### Acyl-CoA thioesterase

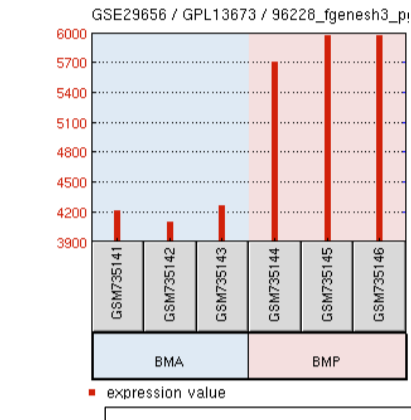

### Aldehyde dehydrogenase

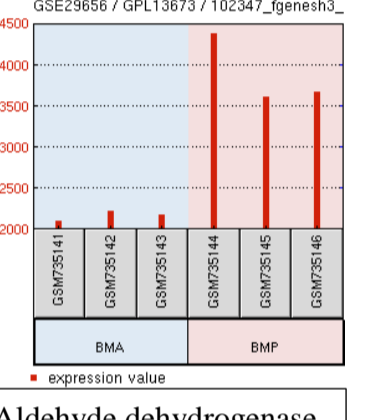

### AIR carboxylase

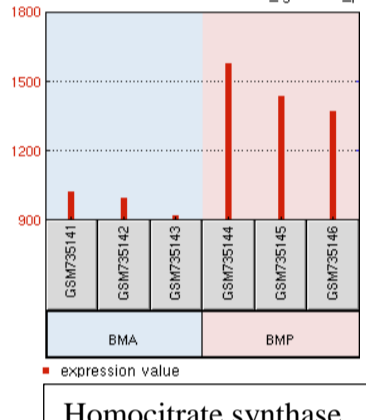

### AAA ATPase

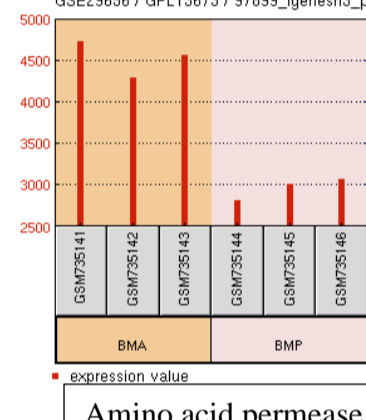

### ABC Transporter

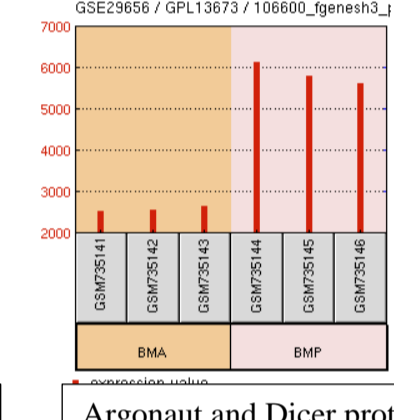

### Acyl-CoA Thioesterase

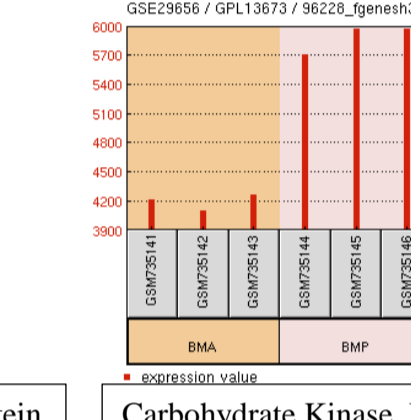

### Aldehyde dehydrogenase

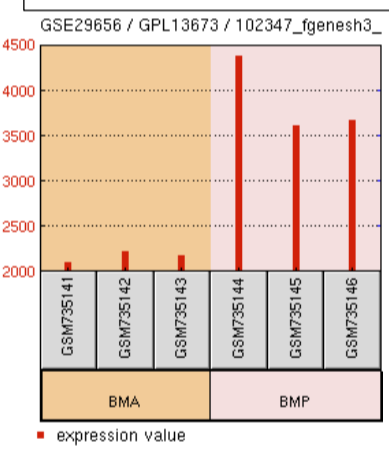

### Homocitrate synthase

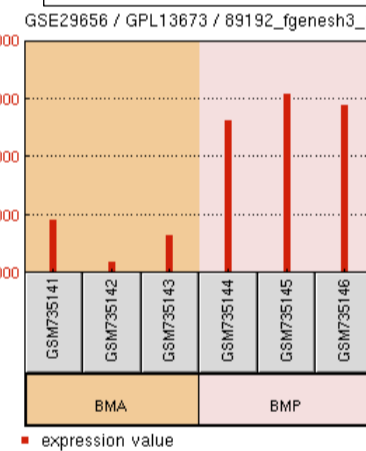

### Amino acid permease

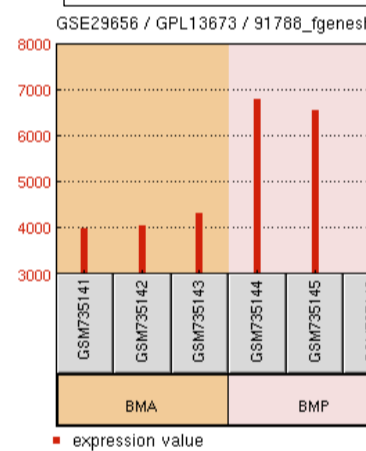

### Argonaut and Dicer protein

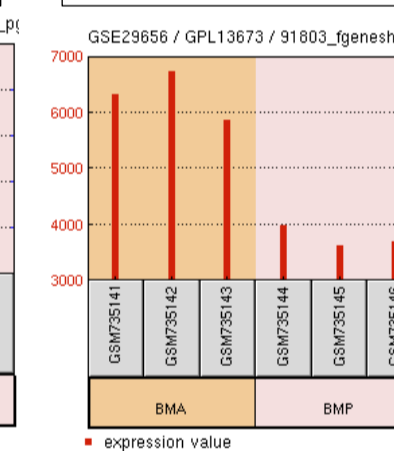

### Carbohydrate Kinase, FGGY

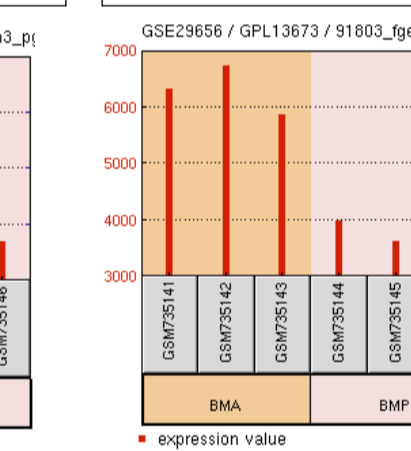

### CBM V/ XII

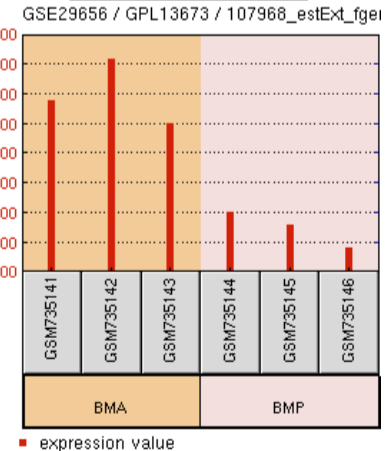

### Chitinase-II

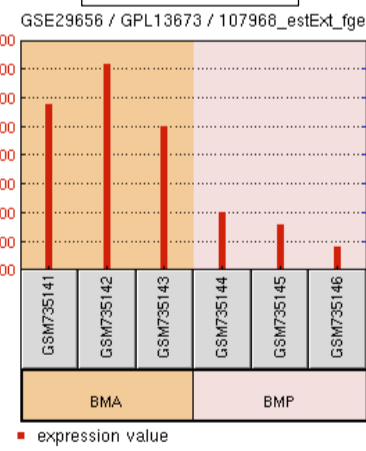

### Cytochrome b5

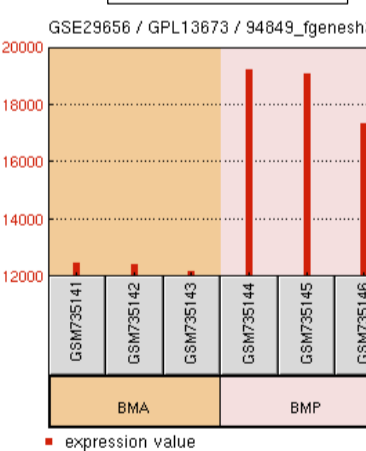

### Cytochrome c heme binding

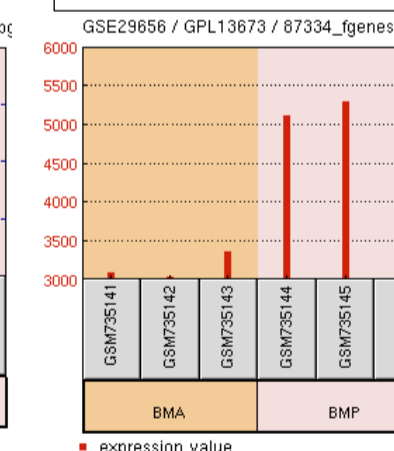

### Cytochrome P450

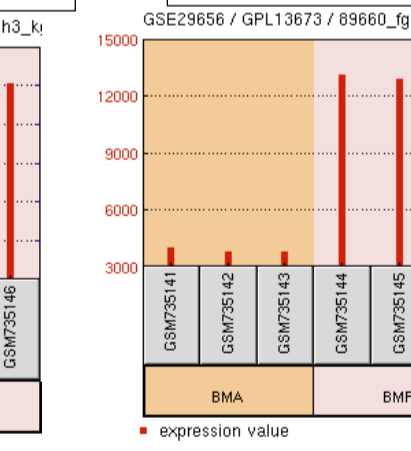

### Cytochrome P450

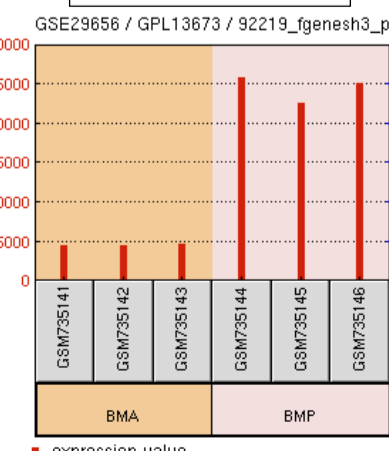

### Cytochrome P450

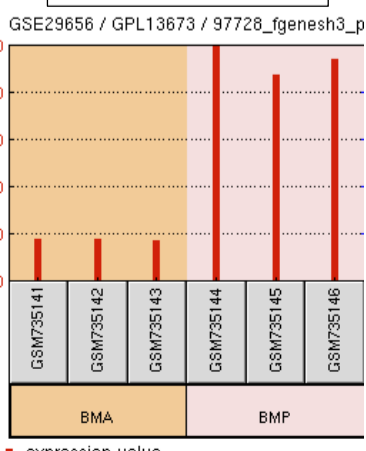

### Cytochrome P450

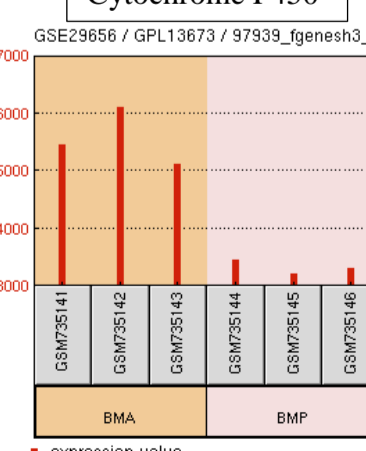

### E-class P450 group-I

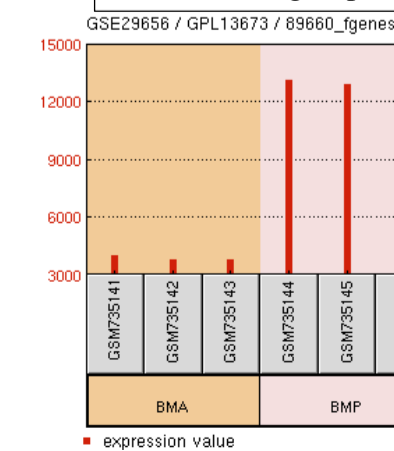

### E-class P450 group-I

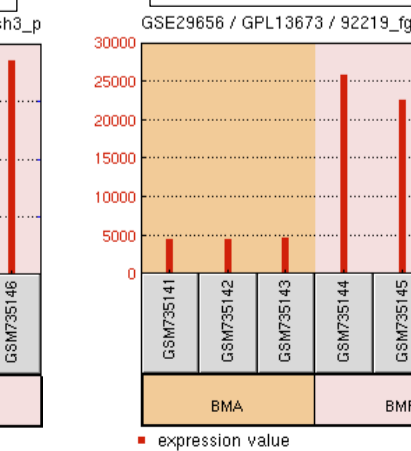



### Esterase/Lipase/Thioesterase

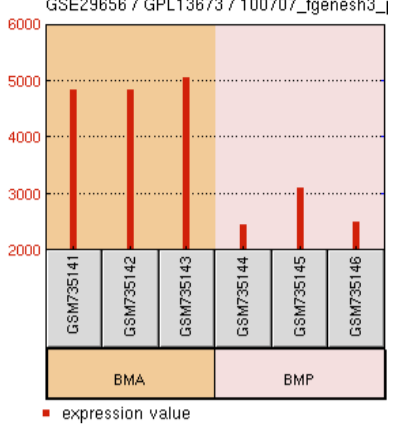

### Flavodoxin (NOS)

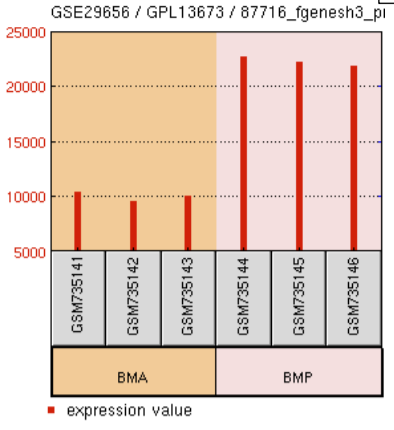

### Glucose/ribitol dehydrogenase

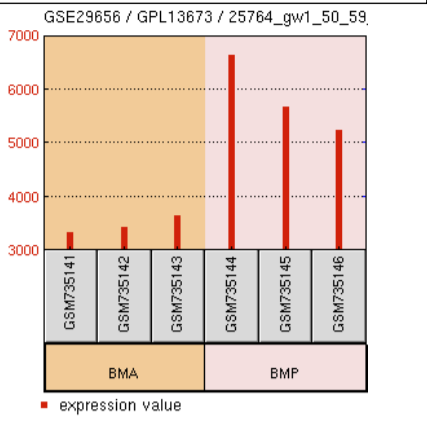

### Epoxide hydrolase

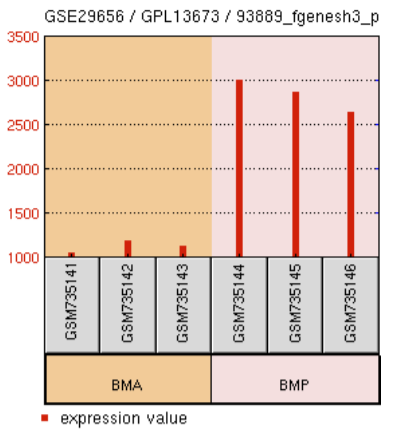

### HMG-CoA Lyase

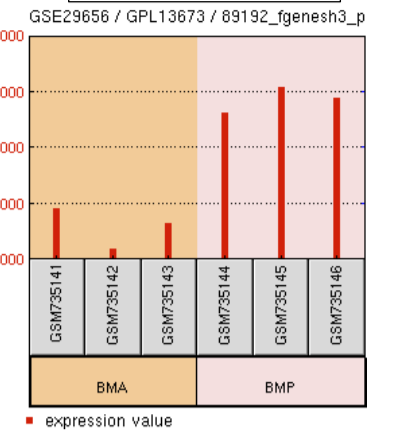

### Isoflavone reductase

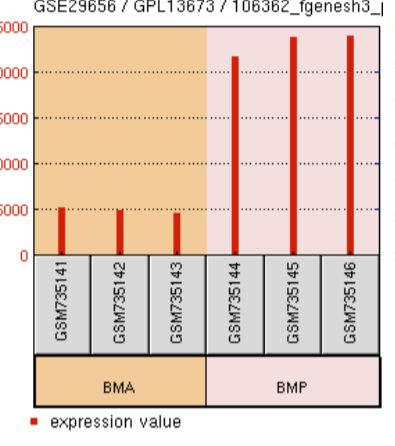

### Major Facilitator Superfamily

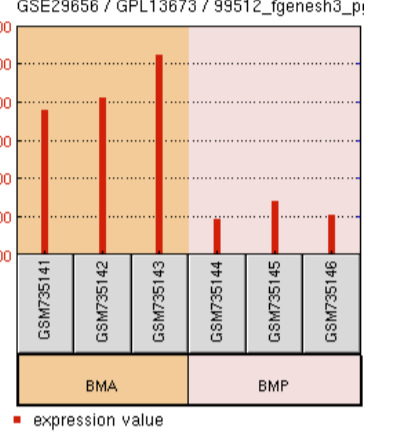

### Mitochondrial carrier protein

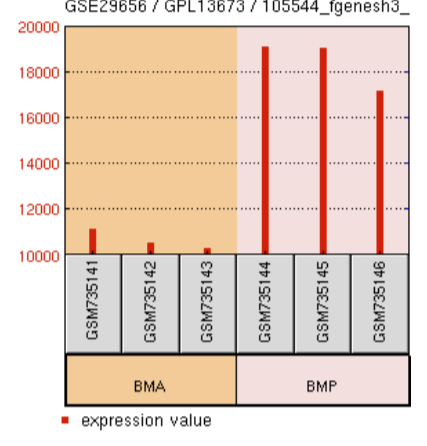

### FAD Monooxygenase

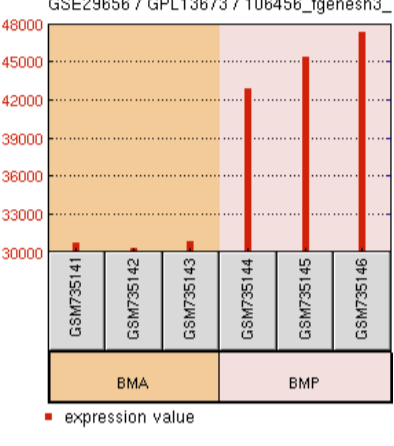

### Multicopper oxidase

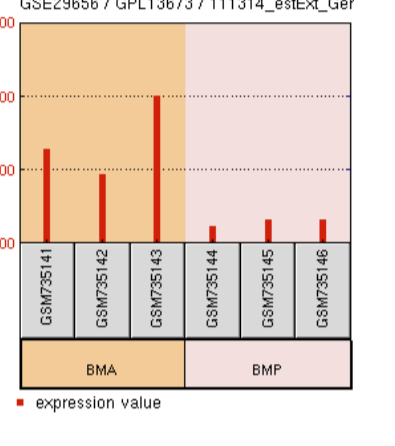

### NADH flavin oxidoreductase

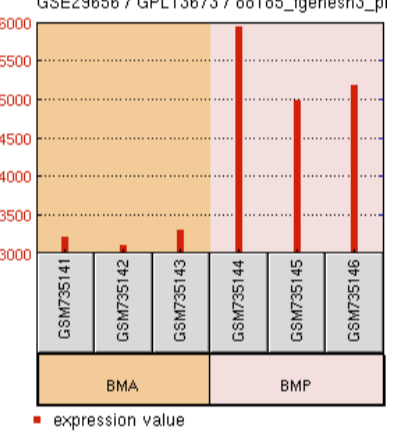

### FAD Oxidoreductase

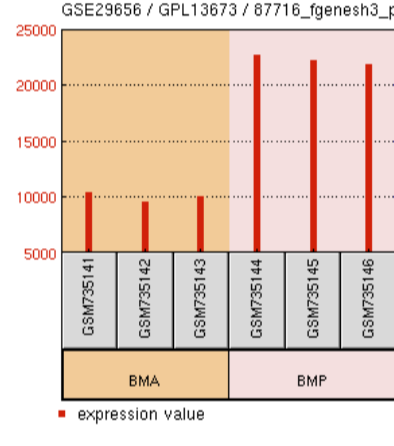

### DAHP synthetase

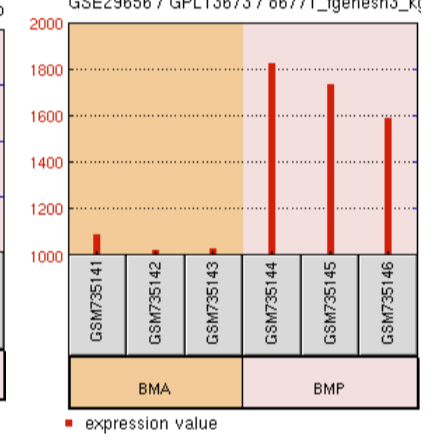

### Short chain dehydrogenase

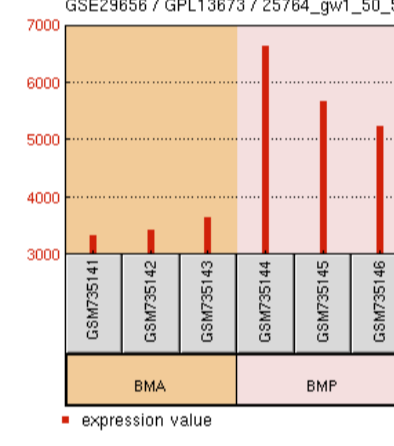

### Sugar Transporter family

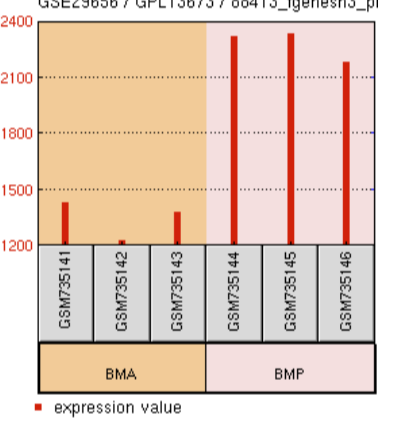

### Tannase/Feruloyl esterase

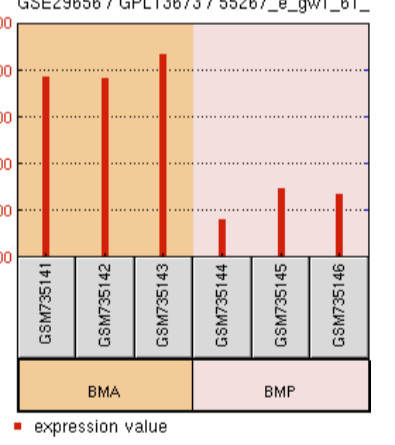

### Terpene Synthase

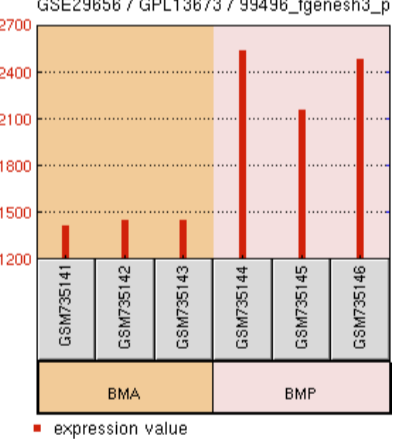

### Transketolase

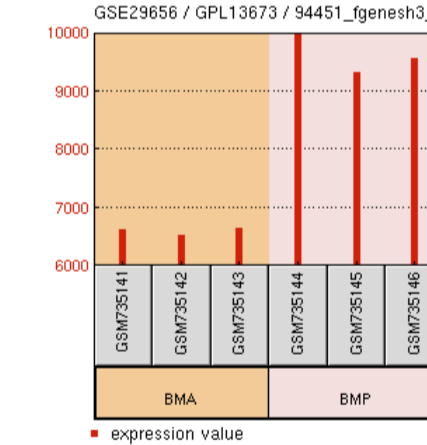

### Zinc alcohol dehydrogenase

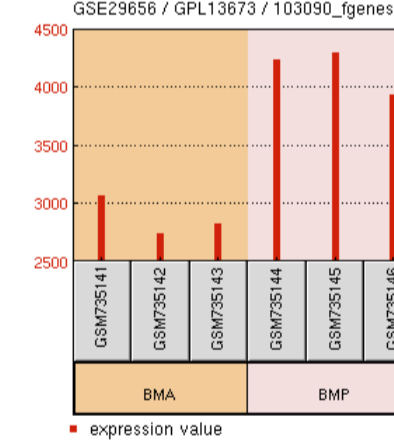

### Phenylalanine ammonia lyase

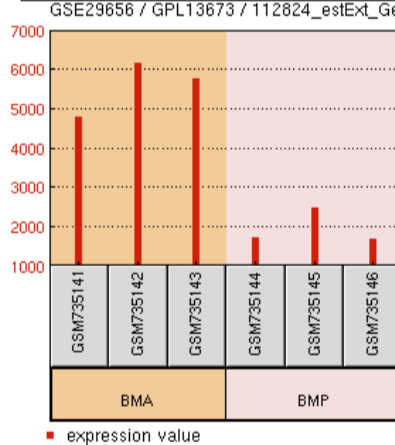

### 4-Coumarate CoA Ligase

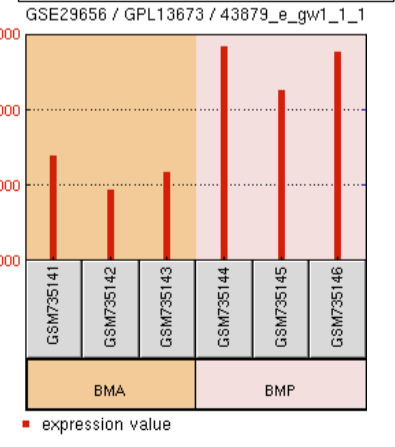

### O-methyl transferase

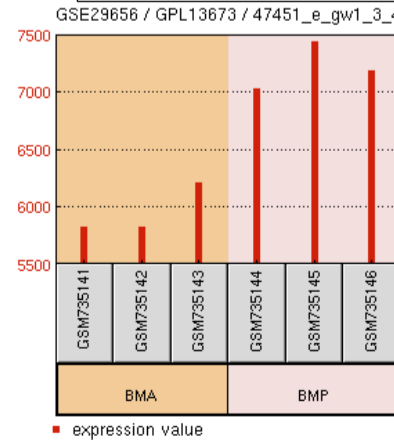

### 1,4-benzoquinone reductase

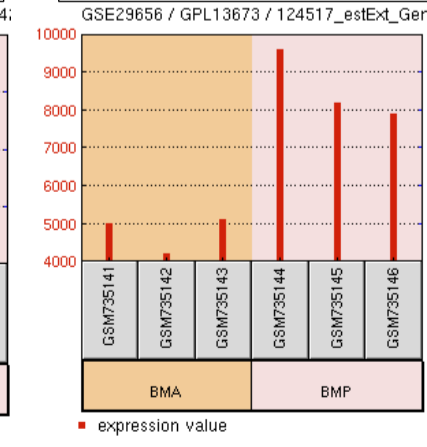

### Polyphenol oxidase

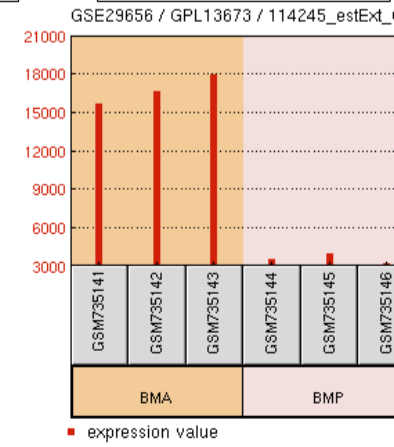

### Copper radical oxidase

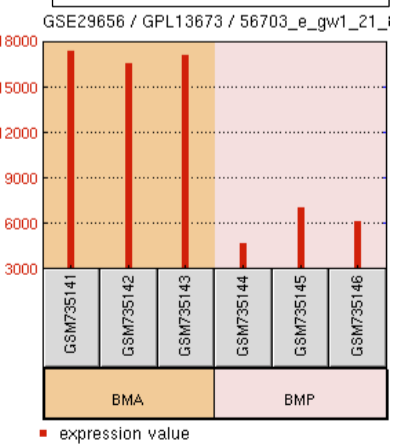

## Differentially expressed genes in GSE69004 dataset:

### Glycoside hydrolase- 47

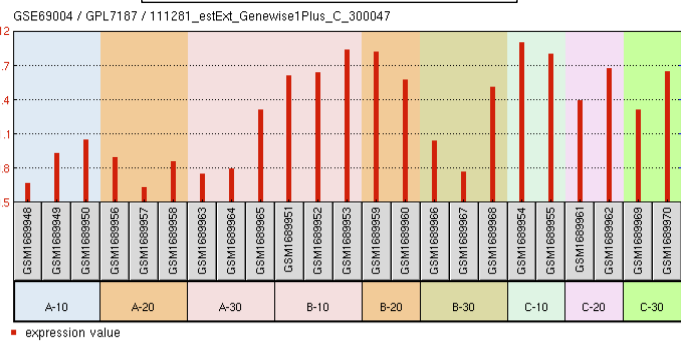

### Auxiliary activity-3

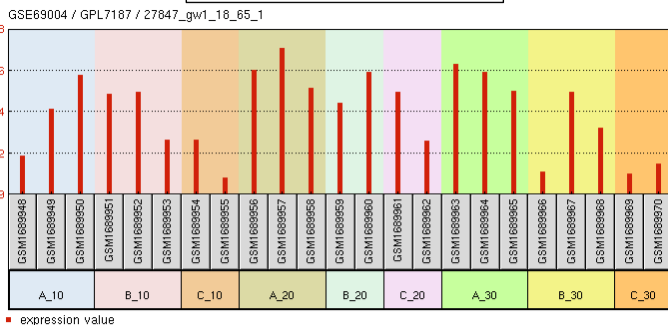

### Glycoside hydrolase-128

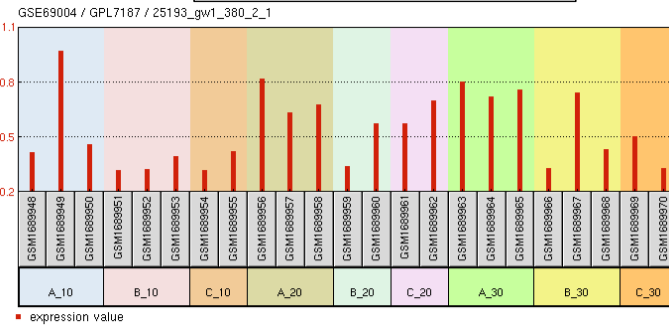

### Glycoside hydrolase-55

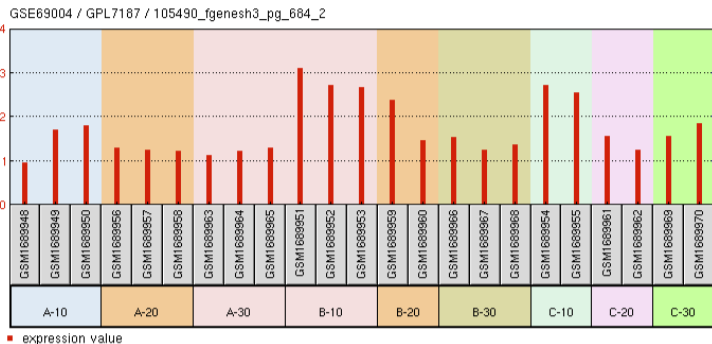

### Glycoside hydrolase-37

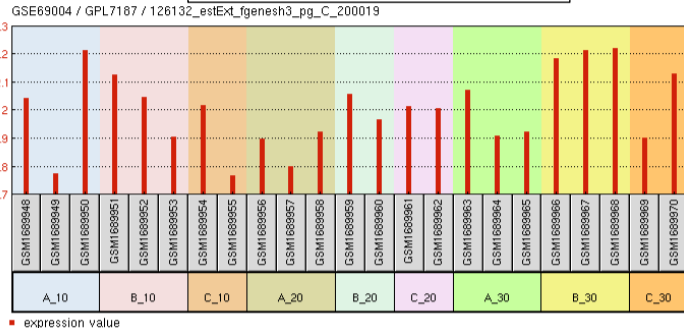

### Glycosyl Transferase-20

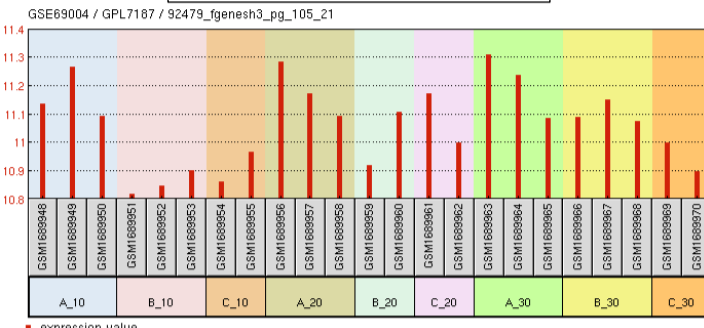

### Glycoside hydrolase- 27

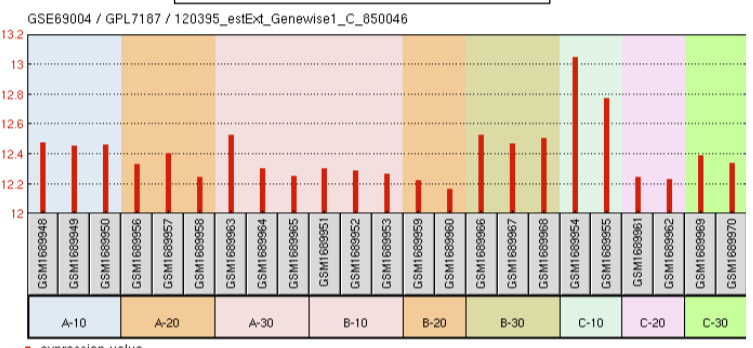

### Glycoside hydrolase- 16

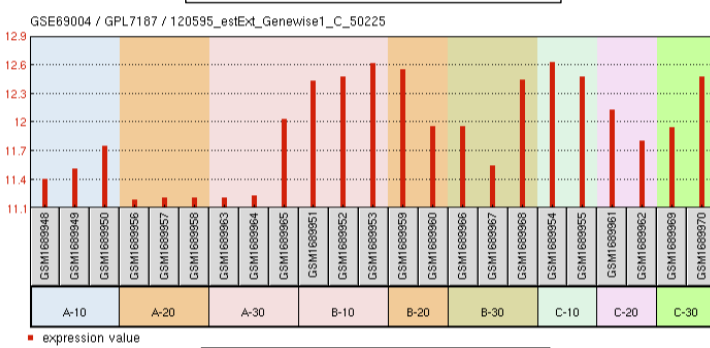

### Carbohydrate binding domain-21

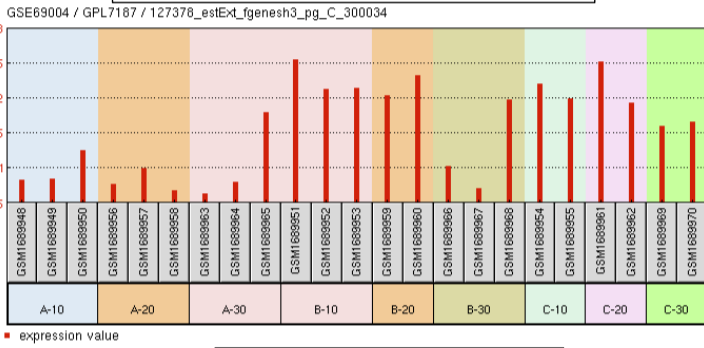

### Glycoside hydrolase - 2

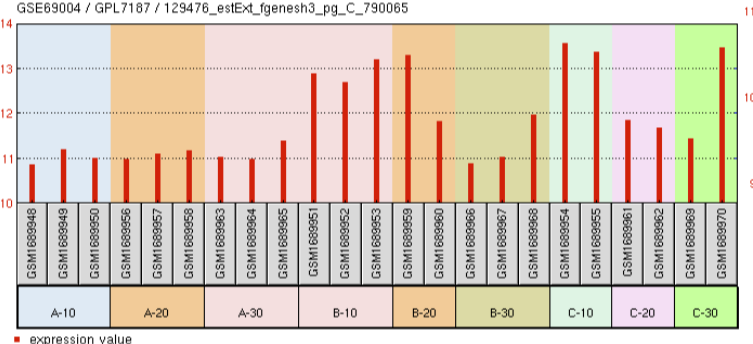

### Glycoside hydrolase - 5

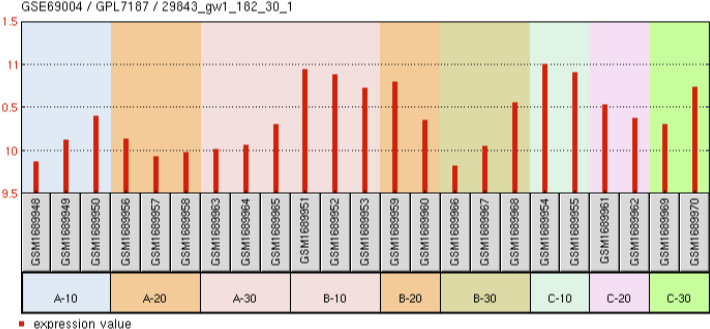

### Glycosyl transferase -8

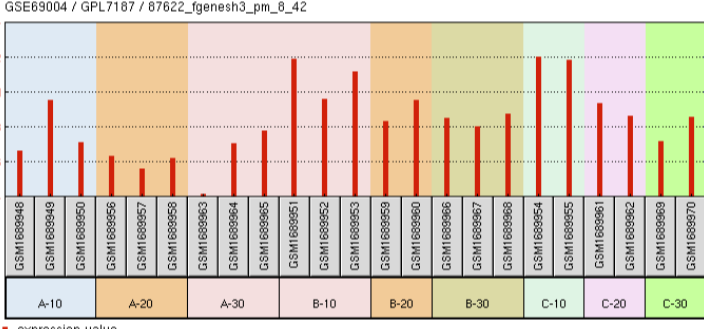

### Carbohydrate binding domain- 13

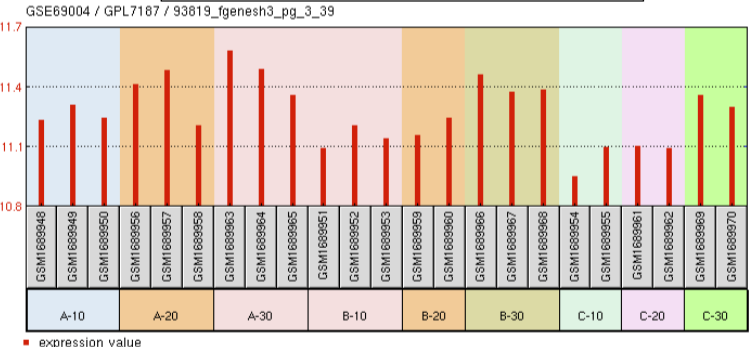

### Glycoside hydrolase - 71

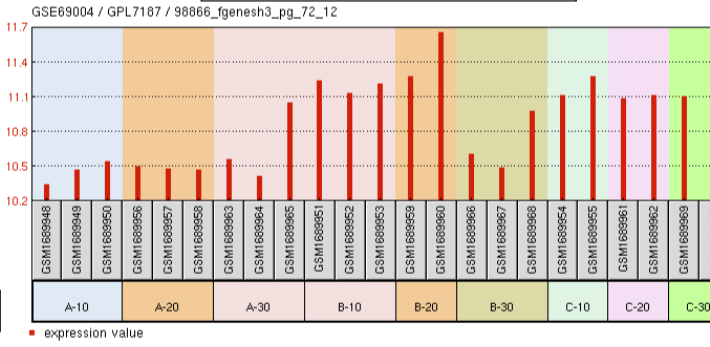

### AAA ATPase

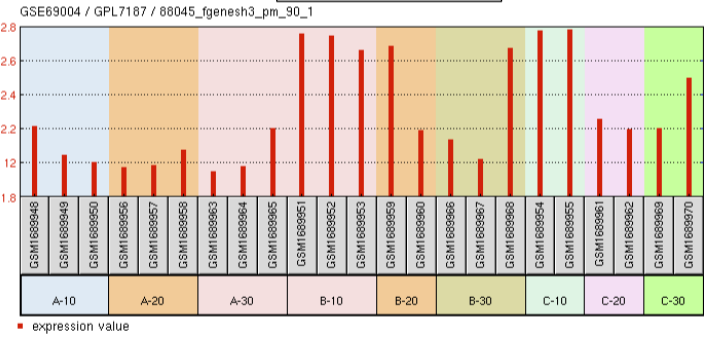

### Acyl-CoA dehydrogenase

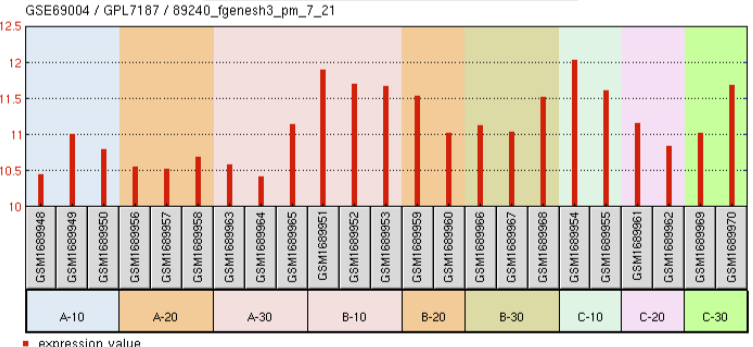

### Aldo/Keto reductases

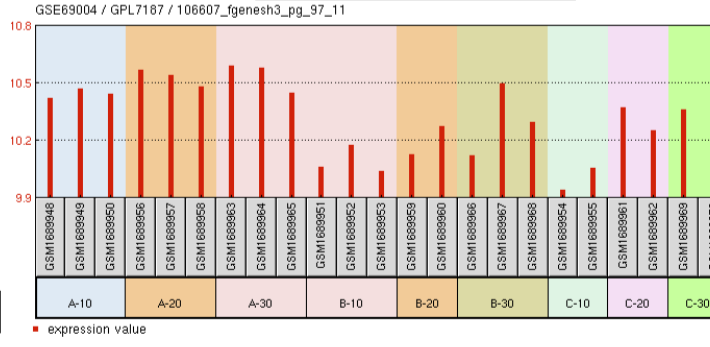

### Amino acid Permease

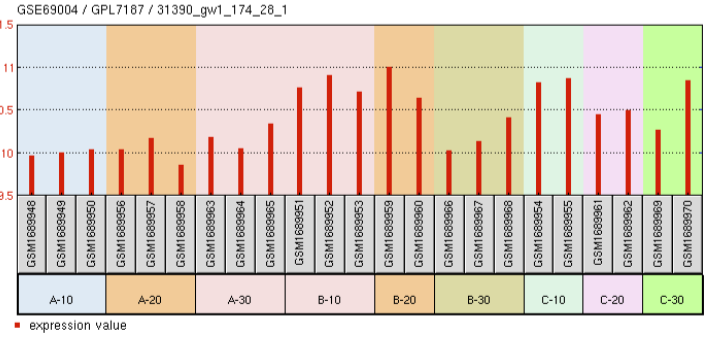

### Argonaut and Dicer Protein

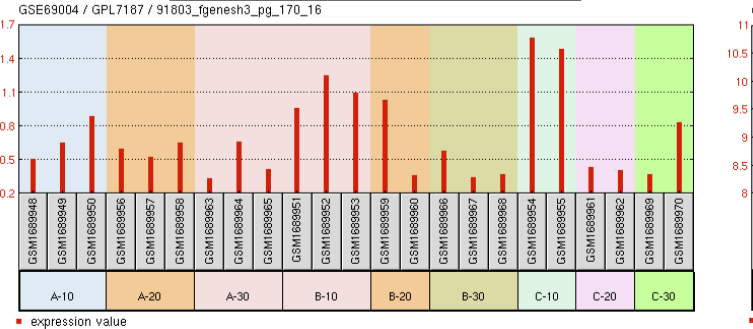

### Basic helix loop helix (BHLH)

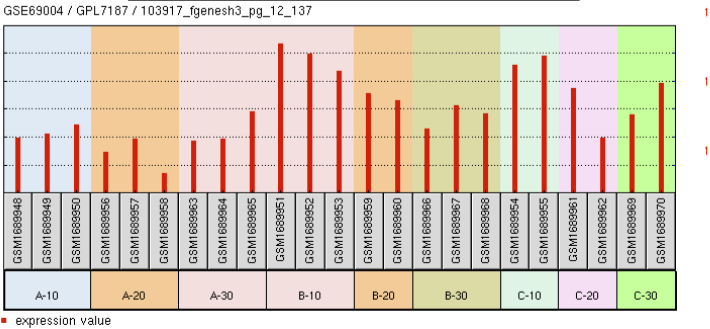

### Basic leucine zipper (bZIP)

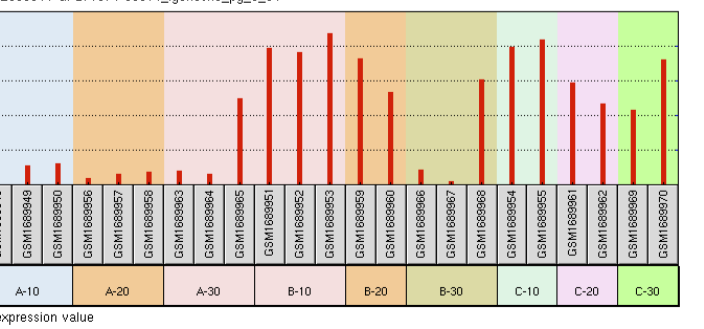

### Carboxylesterase type B

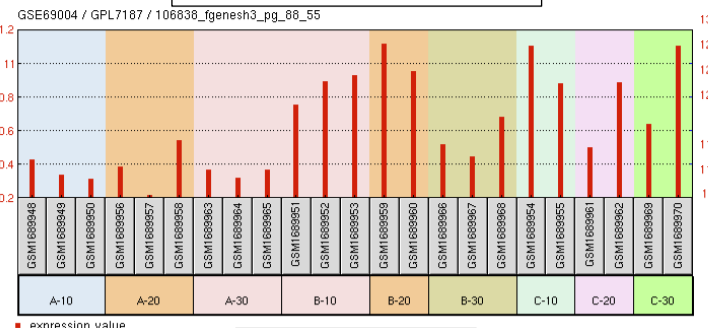

### Cytochrome b5

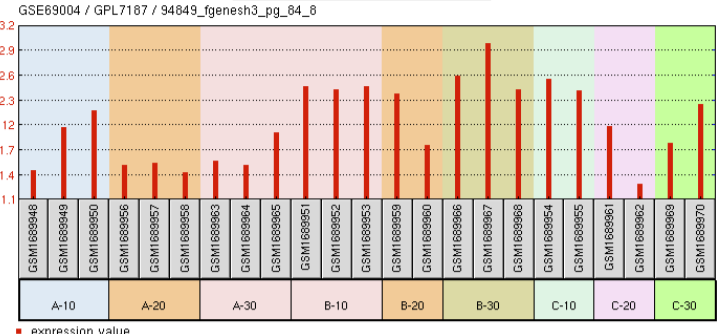

### Cytochrome c

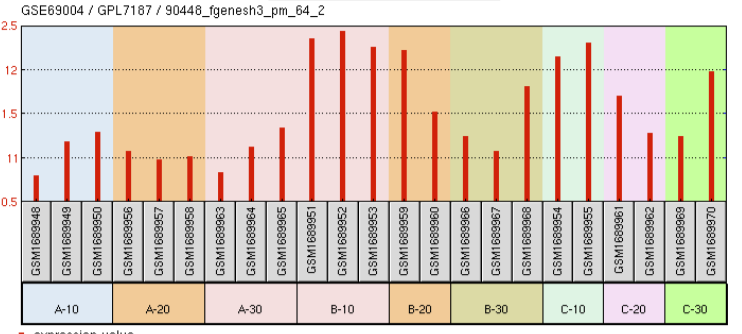

### Cytochrome c

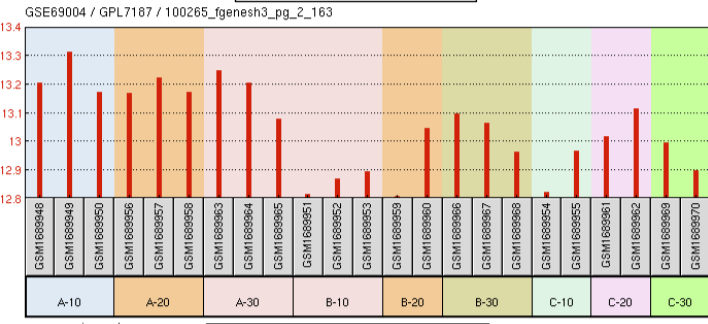

### Cytochrome P450

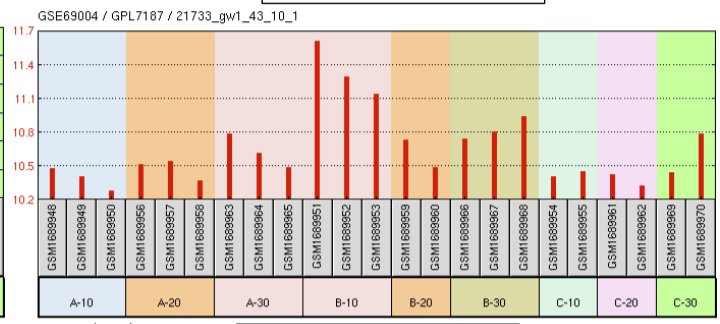

### Cytochrome P450

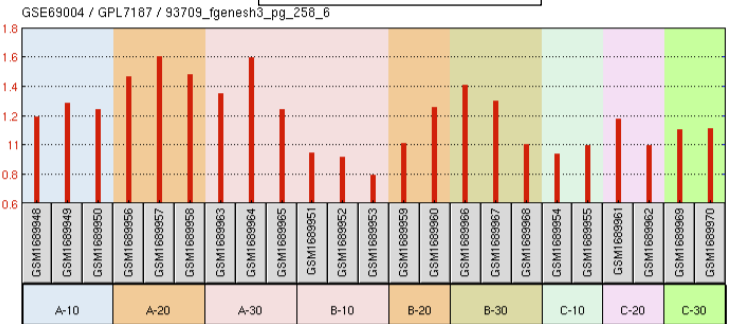

### Cytochrome P450

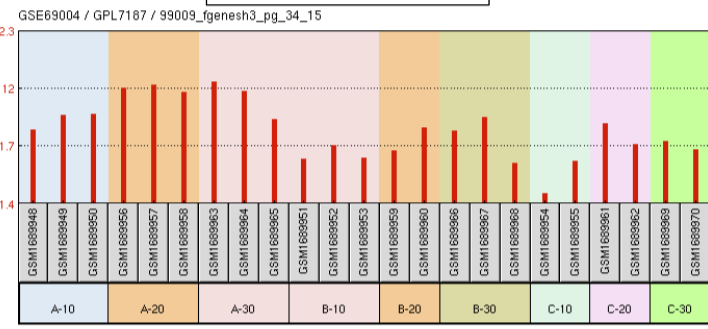

### Cytochrome P450

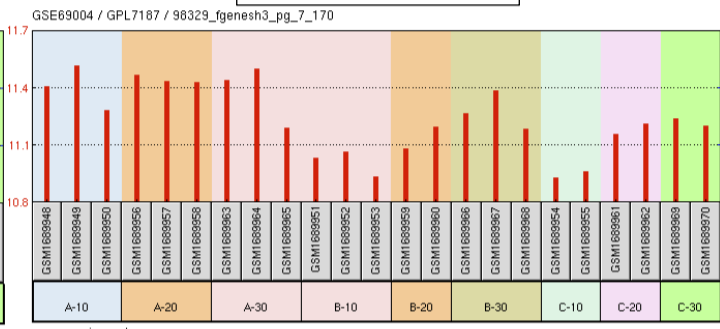

### Cytochrome P450

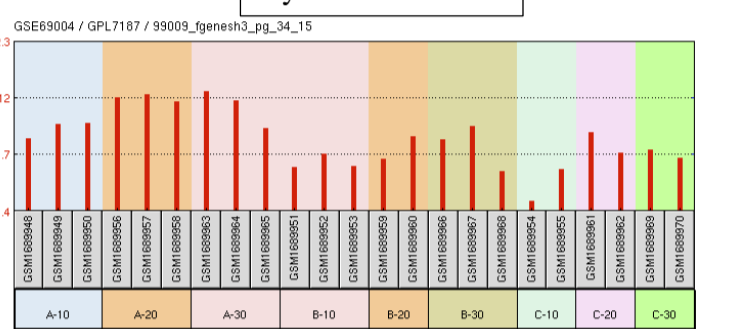

### Dienelactone hydrolase

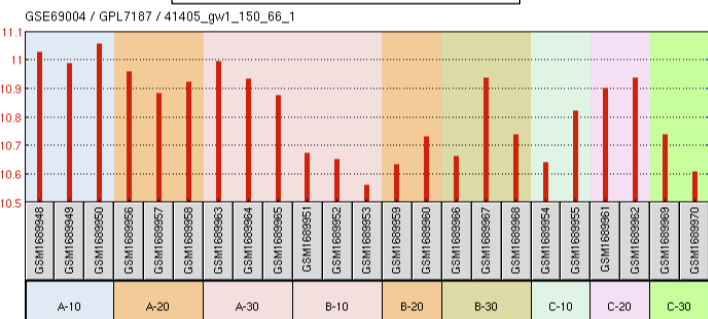

### E-class P450, group I

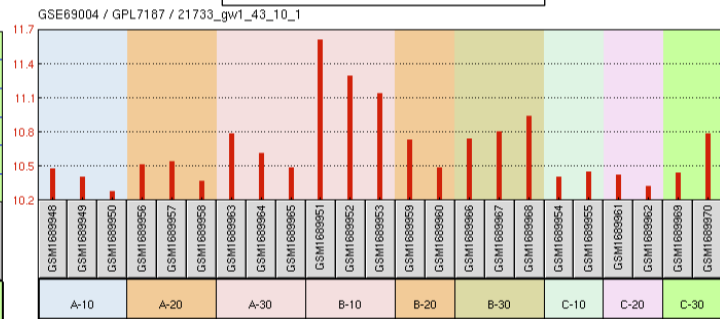

### E-class P450, group IV

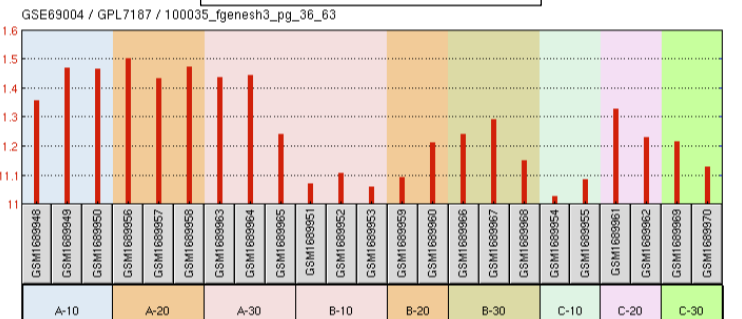

### Esterase/Lipase/Thioesterase

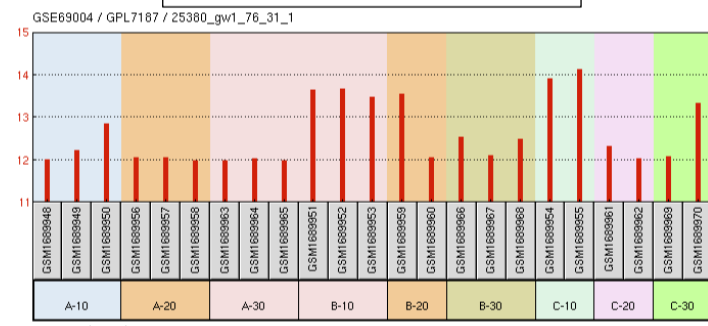

### Esterase/Lipase/Thioesterase

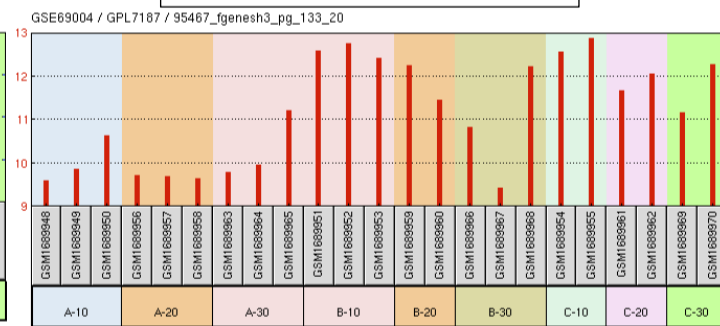

### Induced cAMP Protein

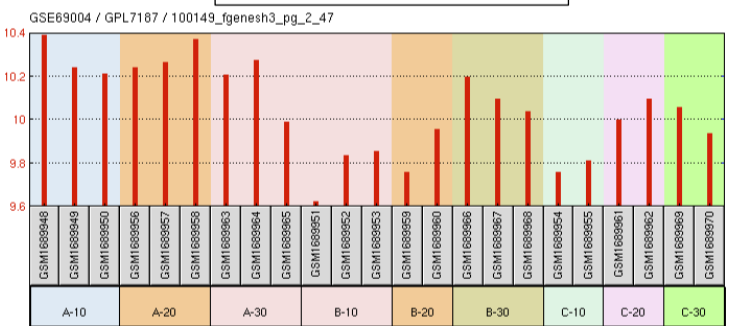

### Glutathione-S-Transferase

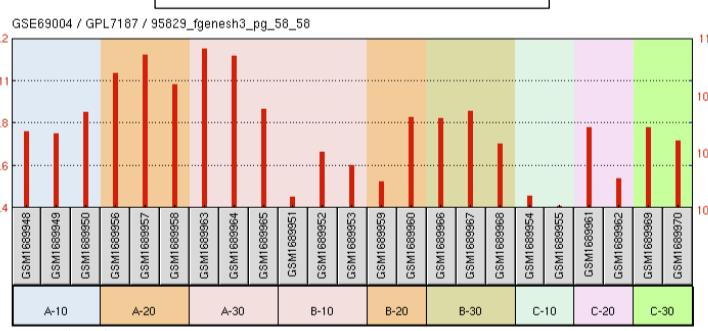

### G-Protein beta WD-40

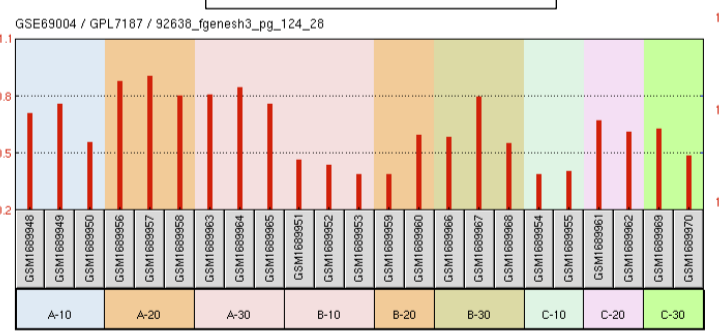

### G-Protein beta WD-40

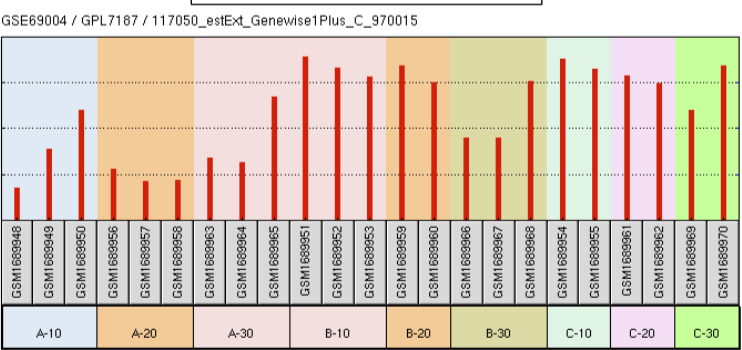

### Haloacid dehalogenase

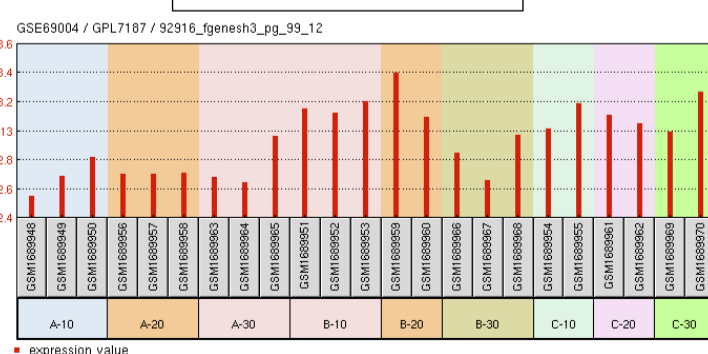

### Heat Shock factor

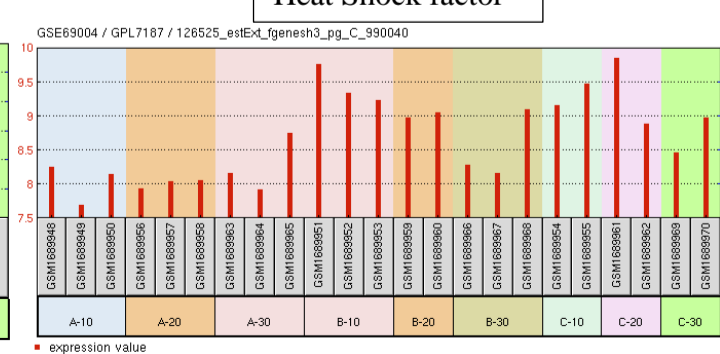

### Iron Permease FTR1

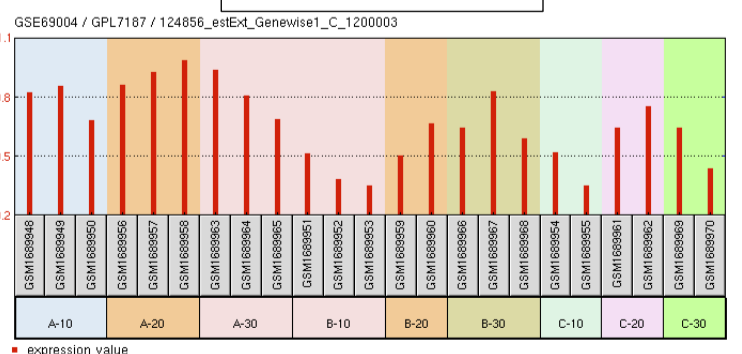

### Mandelate racemase

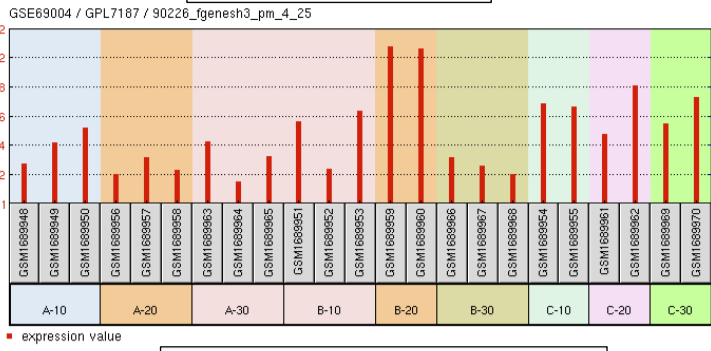

### Metallophosphoesterase

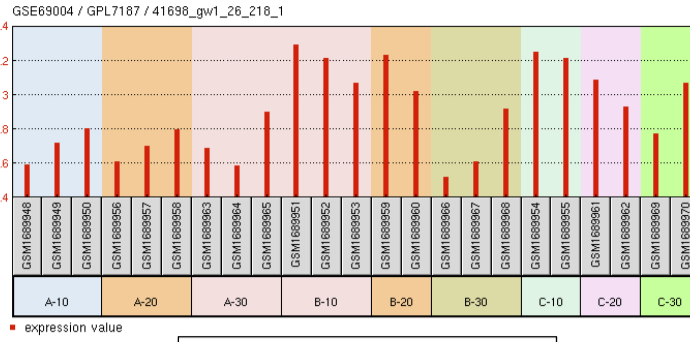

### FAD Monooxygenase

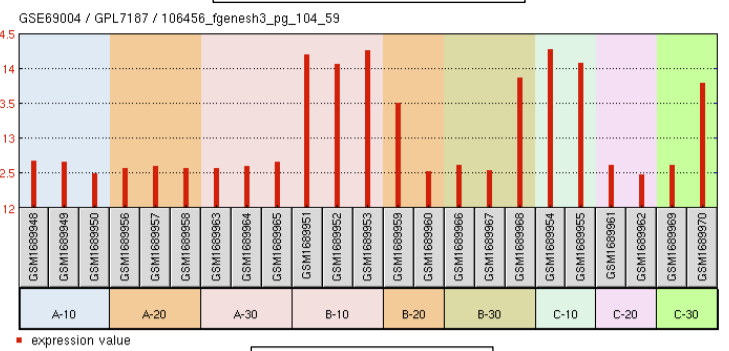

### NADH Flavin oxidoreductase

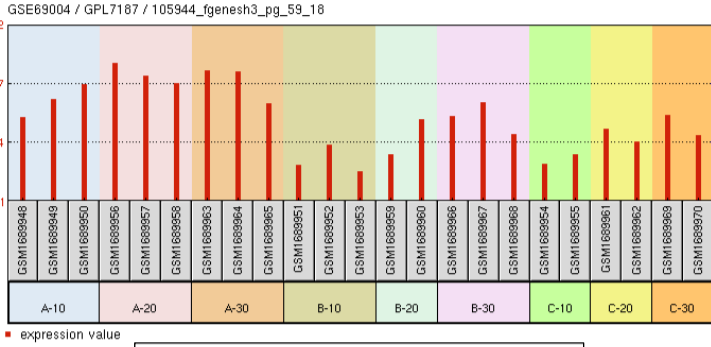

### Oligopeptide transporter

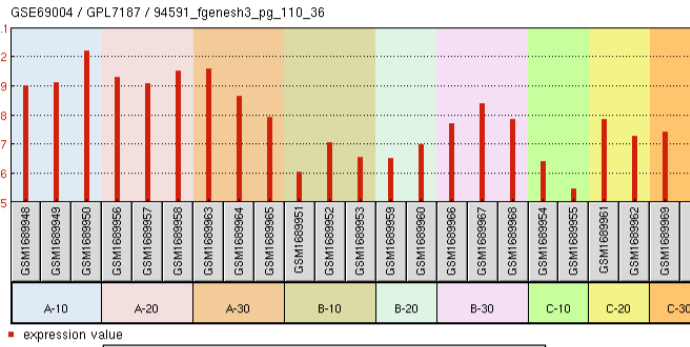

### Oxidoreductase

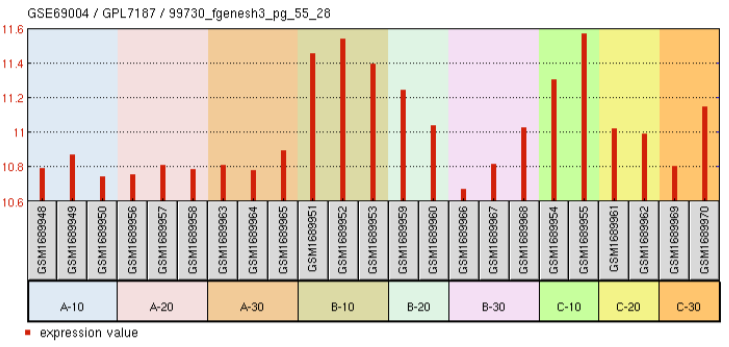

### Sugar Transporter Superfamily

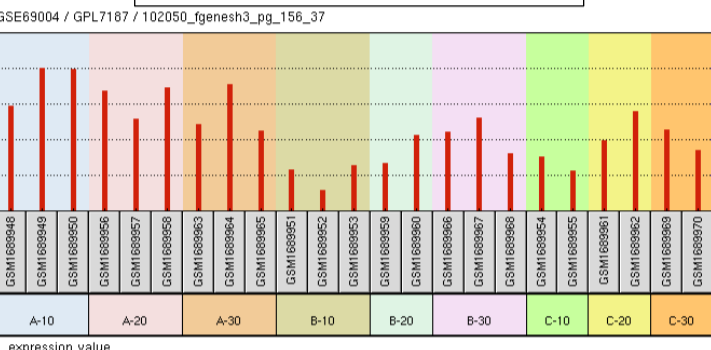

### Sugar Transporter Superfamily

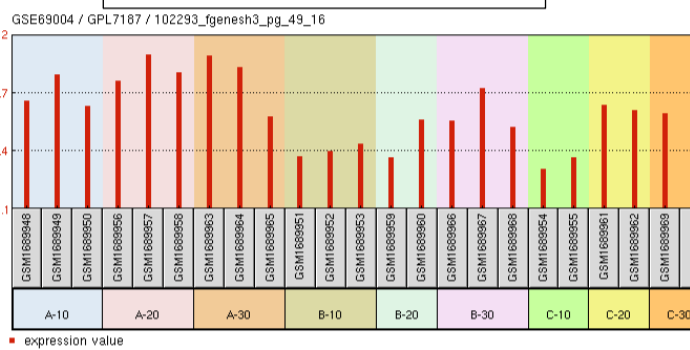

### Thiolase

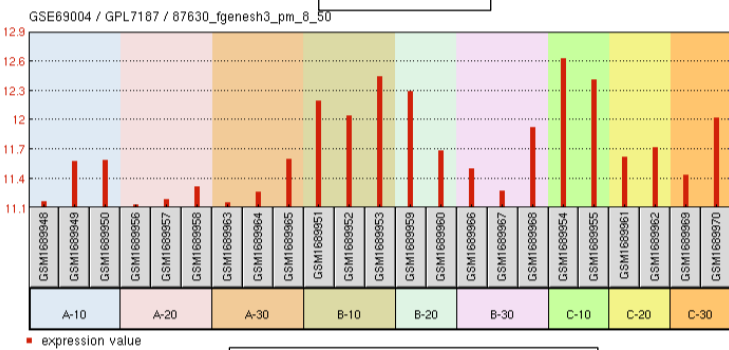

### UbiA Prenyltransferase

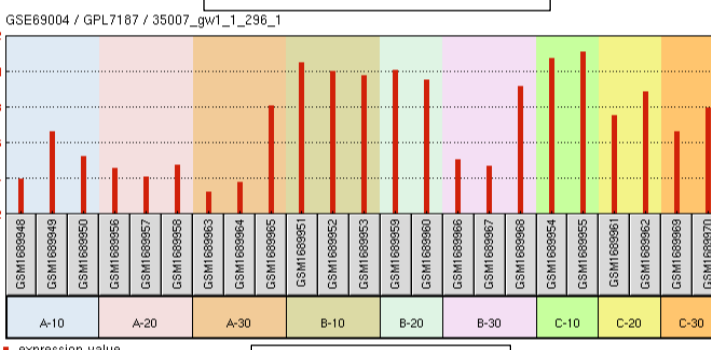

### Ubiquitin

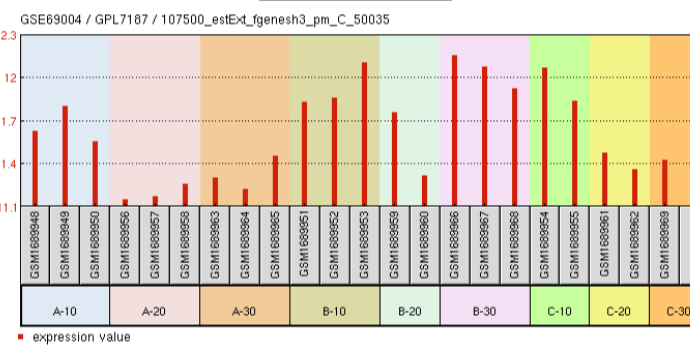

### Universal Stress Protein

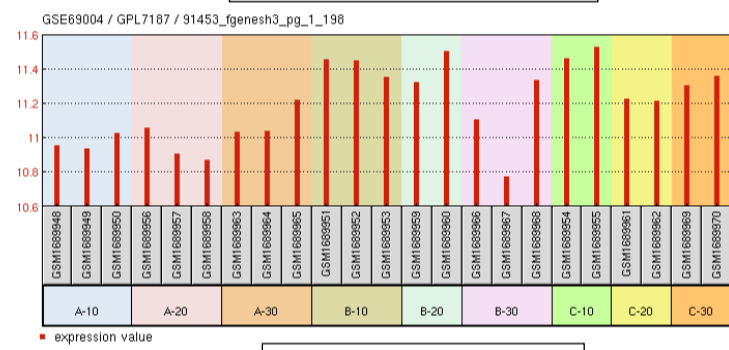

### Alcohol Oxidase

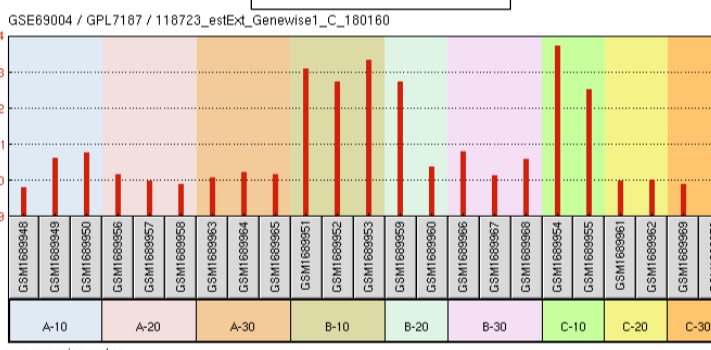

### 2-Nitropropane dioxygenase

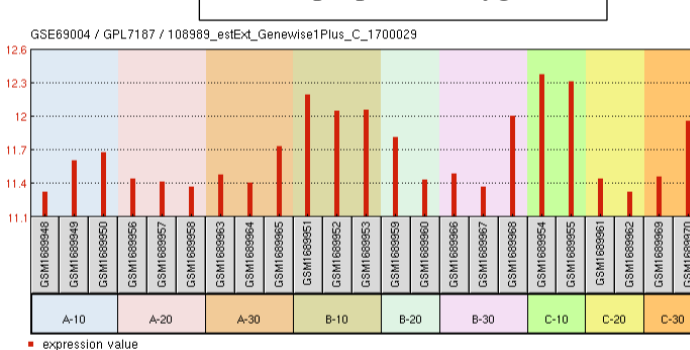

### Flavin monooxygenase

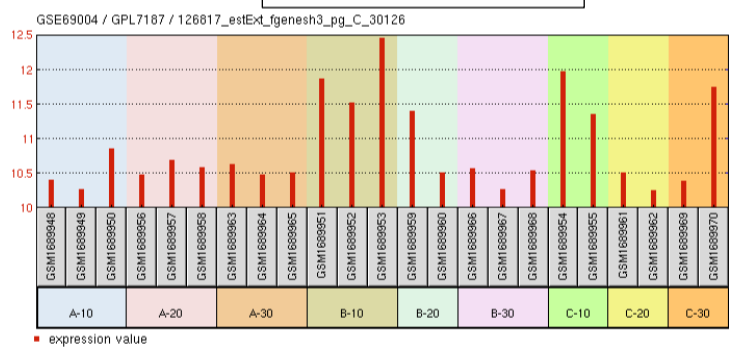

### Glucose Oxidase

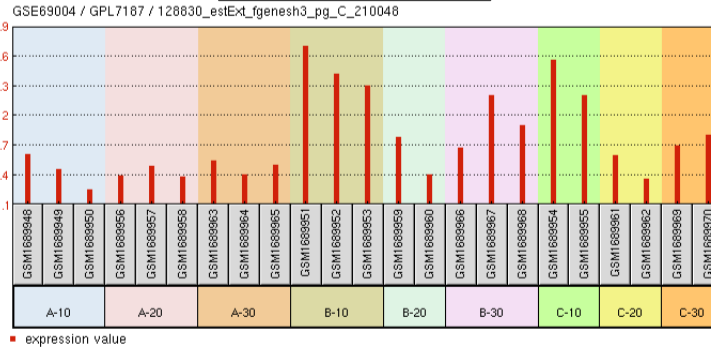

### Glycolate oxidase

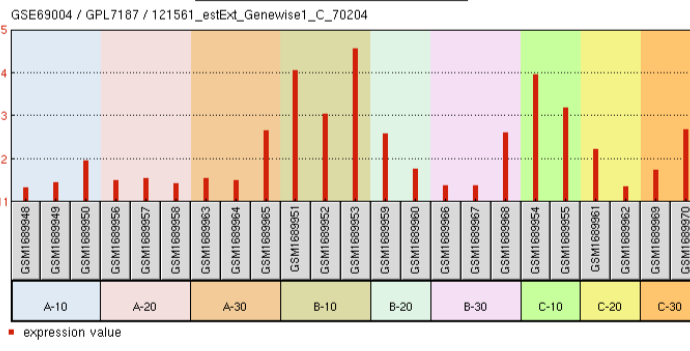

### Peroxidase

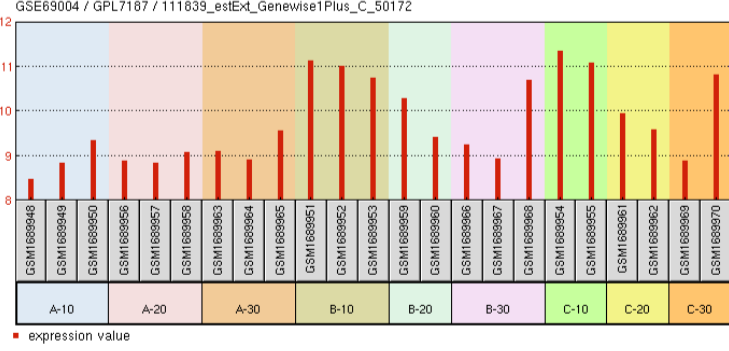

### Carbohydrate esterase 4

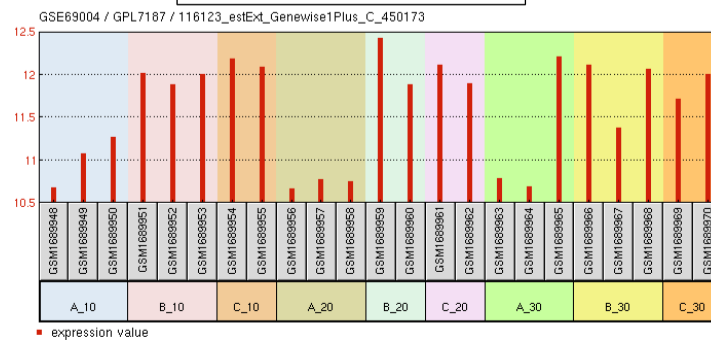

### Carbohydrate binding domain 18

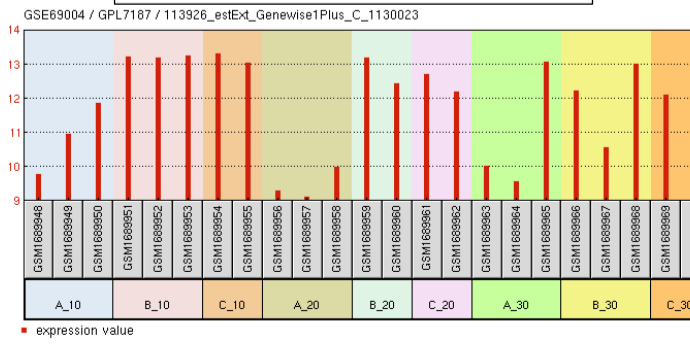

### Carbohydrate binding domain 21

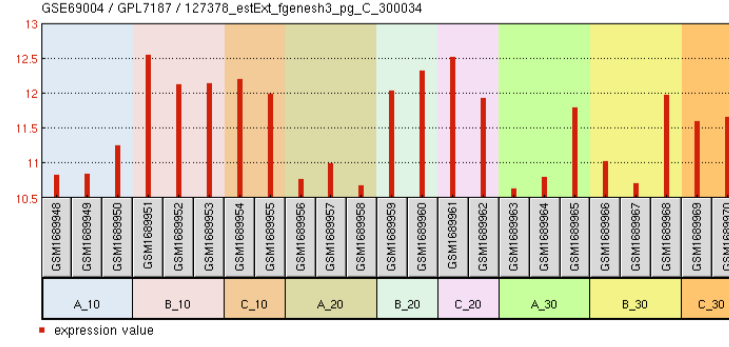

### Glycoside hydrolase 128

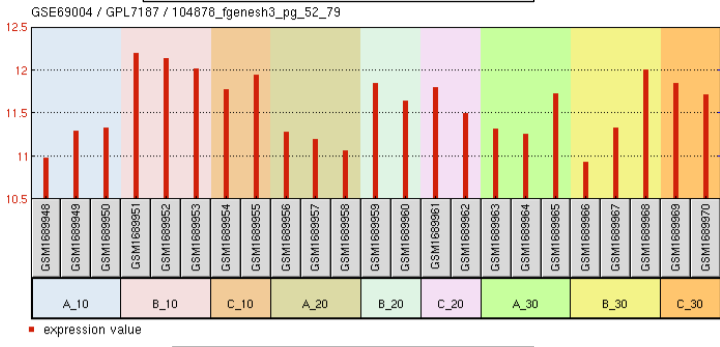

### Glycoside hydrolase 16

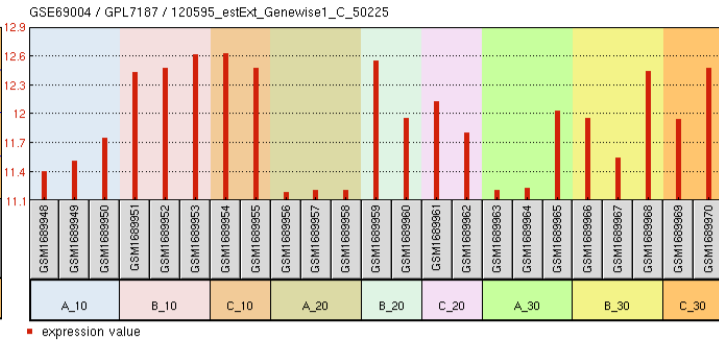

### Glycoside hydrolase 18

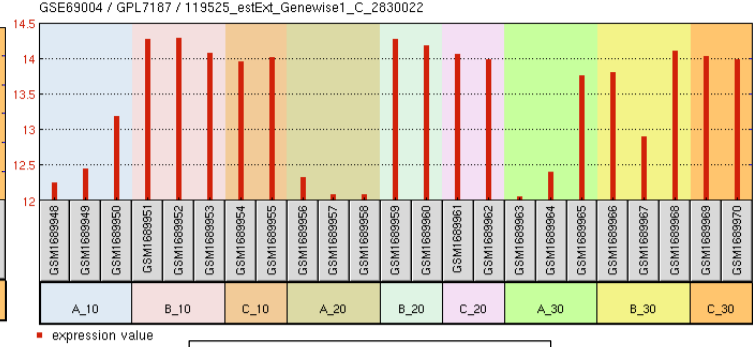

### Glycoside hydrolase 18

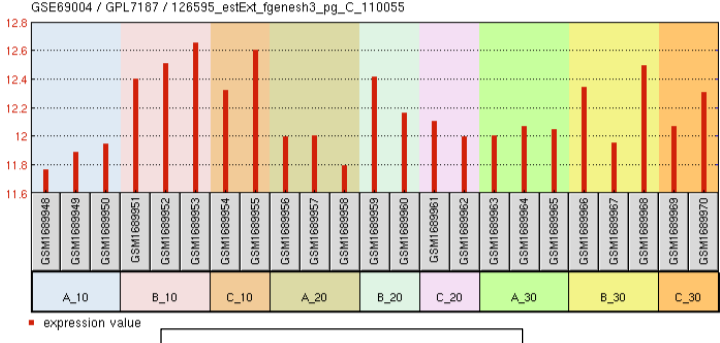

### Glycoside hydrolase 2

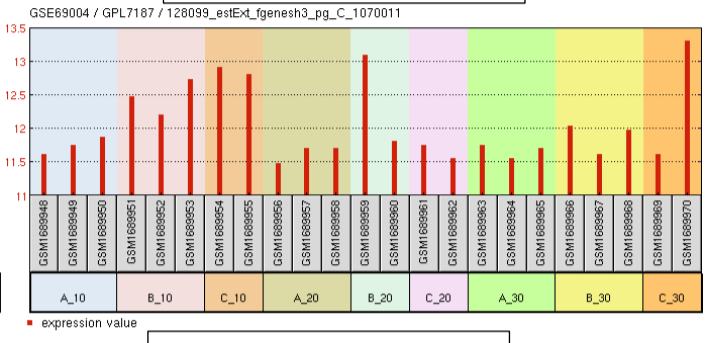

### Glycoside hydrolase 2

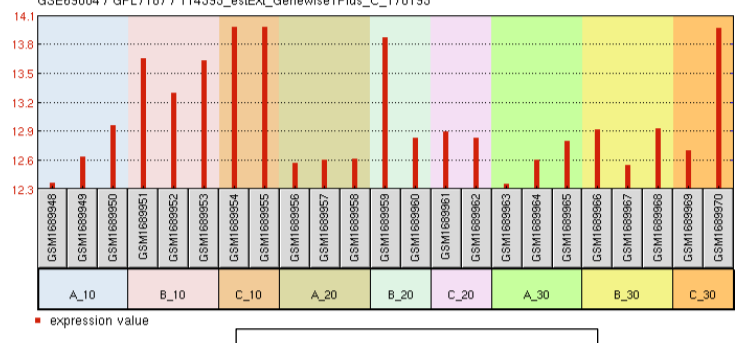

### Glycoside hydrolase 2

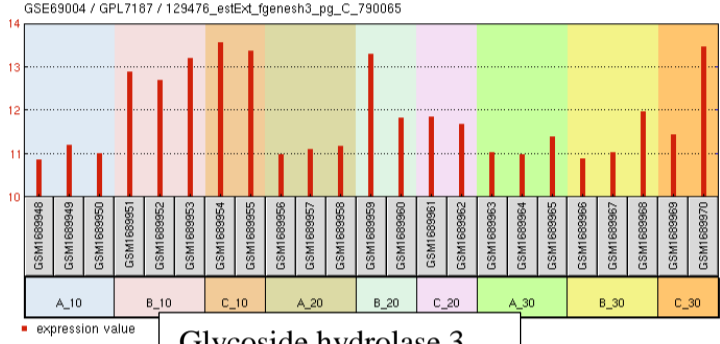

### Glycoside hydrolase 27

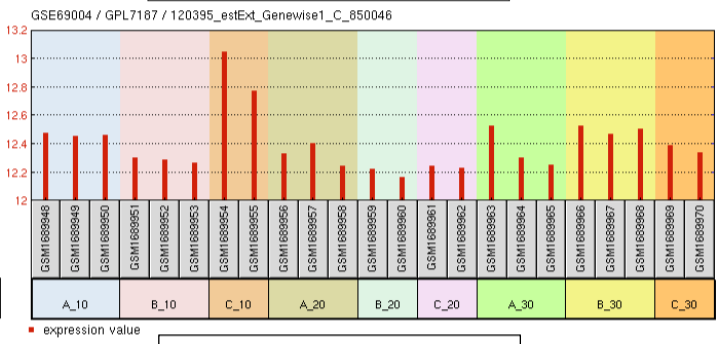

### Glycoside hydrolase 3

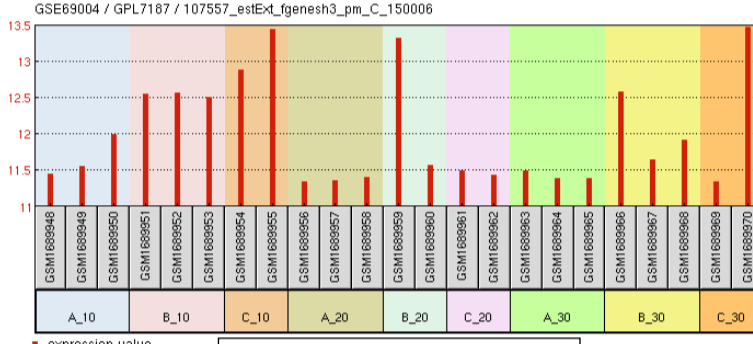

### Glycoside hydrolase 3

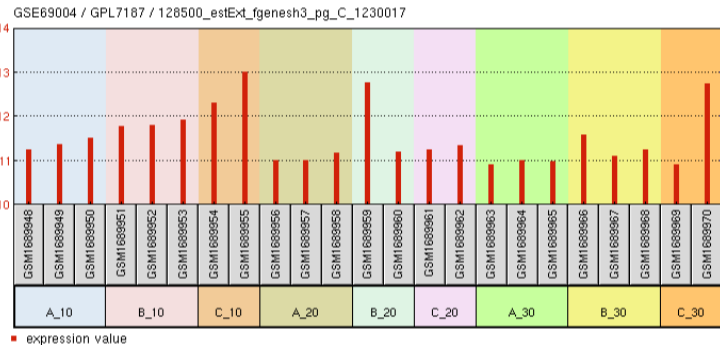

### Glycoside hydrolase 47

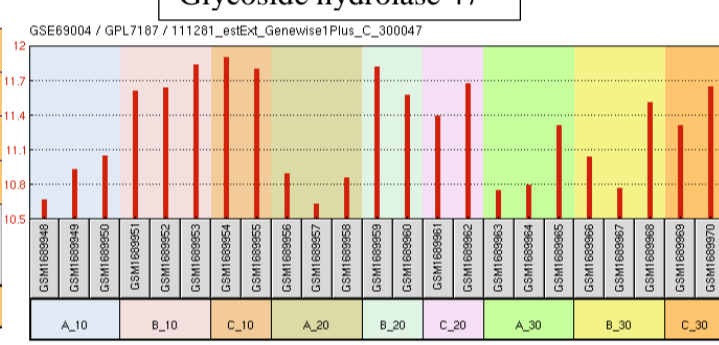

### Glycoside hydrolase 5

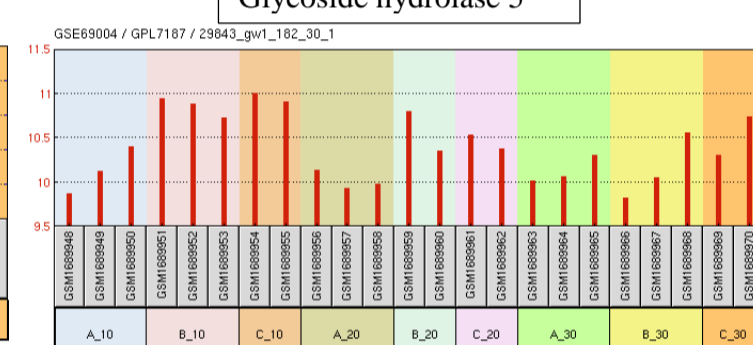

### Glycoside hydrolase 55

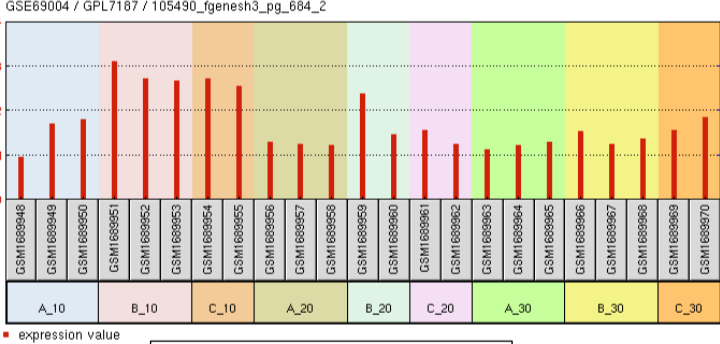

### Glycoside hydrolase 71

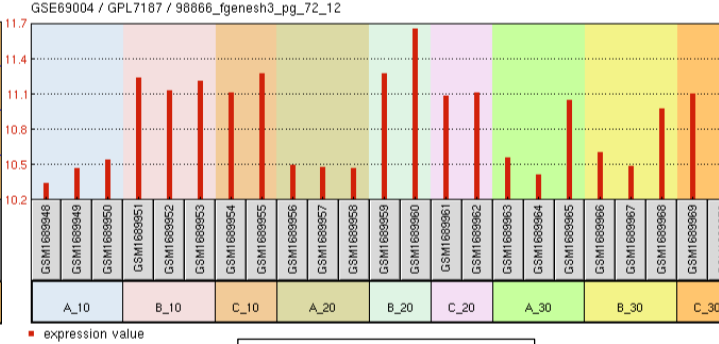

### Glycoside hydrolase 95

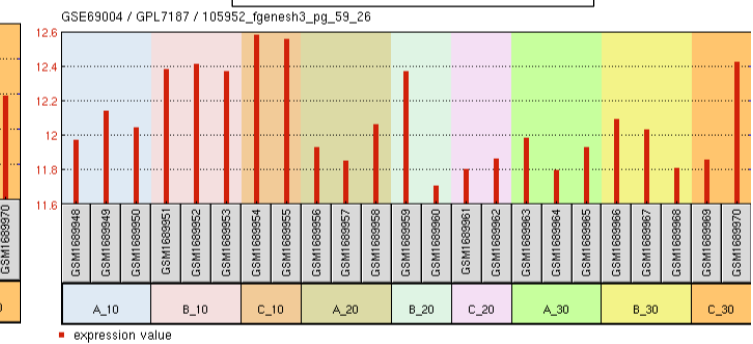

### Glycosyl Transferase 1

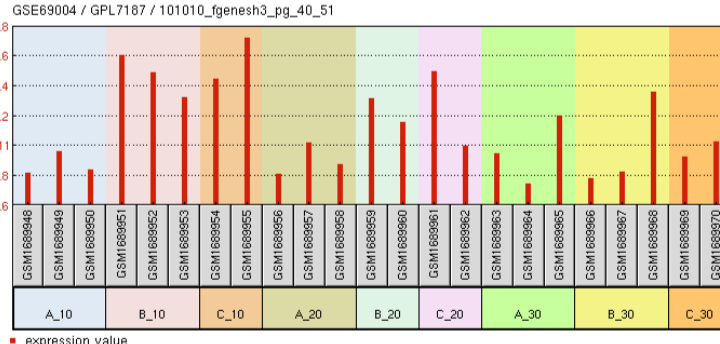

### Auxiliary activity 1

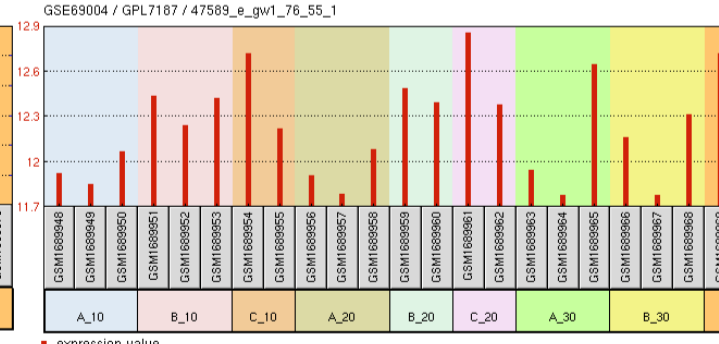

### Glycoside hydrolase 16

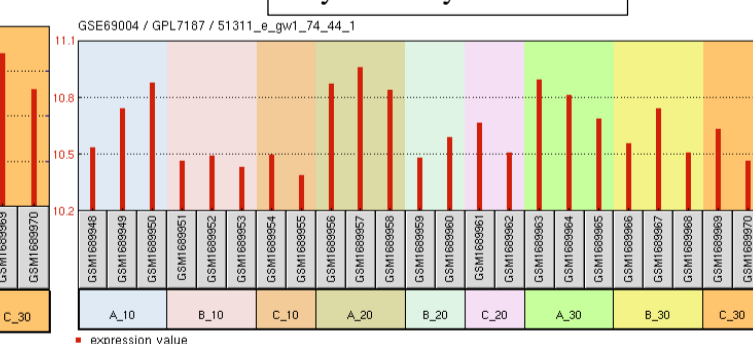

### Glycoside hydrolase- 18

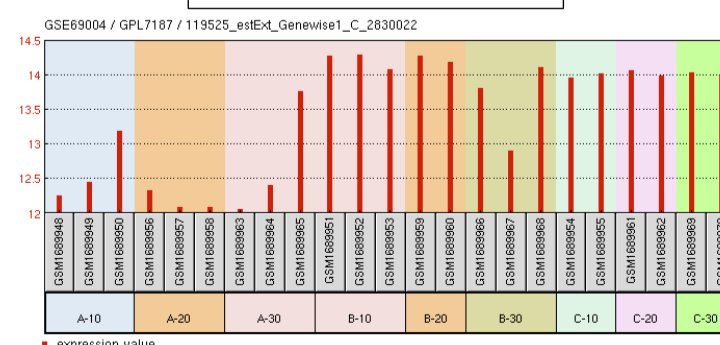

**The customized awk script to specifically retrieve the annotations from the genome wide annotations (CAZy (or) InterPro Id's) was listed below:**

*>awk 'FNR==NR{a[\$1]=\$2;next} (\$1 in a) {print \$1,a[\$1],\$2}' Differentially expressed gene list.txt list with gene level annotations.txt > Final list of expressed genes with annotations.txt*
